1 **Temporal and sex-dependent gene expression patterns in a renal ischemia-reperfusion injury and**  
2 **recovery pig model**

3

4 Stéphane Nemours<sup>1</sup>, Luis Castro<sup>2</sup>, Didac Ribatallada-Soriano<sup>1</sup>, Maria Eugenia Semidey<sup>3</sup>, Miguel Aranda<sup>1</sup>,  
5 Marina Ferrer<sup>4</sup>, Alex Sanchez<sup>5,6</sup>, Joan Morote<sup>2</sup>, Gerard Cantero-Recasens<sup>1</sup>, Anna Meseguer<sup>1,7,8,#</sup>

6

7 Affiliations: <sup>1</sup>Renal Physiopathology Group, CIBBIM-Nanomedicine, Vall d'Hebron Research Institute,  
8 Barcelona, Spain. <sup>2</sup>Biomedical Research in Urology Group, Vall d'Hebron Research Institute, Barcelona,  
9 Spain. <sup>3</sup>Department of Pathology, Hospital Vall d'Hebron, Barcelona, Spain. <sup>4</sup>Rodent Platform, Vall d'Hebron  
10 Research Institute, Universitat Autònoma de Barcelona, Barcelona, Spain. <sup>5</sup>Unitat d'Estadística i  
11 Bioinformàtica, (UEB), Vall d'Hebron Research Institute, Barcelona, Spain. <sup>6</sup>Departamento de Genética,  
12 Microbiología y Estadística. Universitat de Barcelona, Barcelona, Spain, <sup>7</sup>Departament de Bioquímica i  
13 Biologia Molecular, Unitat de Bioquímica de Medicina, Universitat Autònoma de Barcelona, Bellaterra;  
14 Spain. <sup>8</sup>Red de Investigación Renal (REDINREN), Instituto Carlos III-FEDER, Madrid, Spain.

15

16 # Corresponding author:

17 Anna Meseguer: [ana.meseguer@vhir.org](mailto:ana.meseguer@vhir.org)

18 Renal Physiopathology Group, CIBBIM-Nanomedicine, Vall d'Hebron Research Institute,

19 Passeig Vall d'Hebron 119-129, 08035 Barcelona, Spain.

20 Telephone number: +34 934894070; fax number: +34 934894015;

21

22 Running headline: Pathway enrichment analysis following renal IRI and recovery

23

24 Keywords: kidney, ischemia-reperfusion, pathway enrichment, sex difference, pig model, gene expression  
25 patterns

26

27 **ABSTRACT**

28 Men are more prone to acute kidney injury (AKI) and chronic kidney disease (CKD), progressing  
29 to end-stage renal disease (ESRD) than women. Severity and capacity to regenerate after AKI are important  
30 determinants of CKD progression, and of patient morbidity and mortality in the hospital setting. To determine  
31 sex differences during injury and recovery we have generated a female and male renal ischemia/reperfusion  
32 injury (IRI) pig model, which represents a major cause of AKI. Although no differences were found in blood  
33 urea nitrogen (BUN) and serum creatinine (SCr) levels between both sexes, females exhibited higher  
34 mononuclear infiltrates at basal and recovery, while males showed more tubular damage at injury. Global  
35 transcriptomic analyses of kidney biopsies from our IRI pig model revealed a sexual dimorphism in the  
36 temporal regulation of genes and pathways relevant for kidney injury and repair, which was also detected in  
37 human samples. Enrichment analysis of gene sets revealed five temporal and four sexual patterns  
38 governing renal IRI and recovery. Overall, this study constitutes an extensive characterization of the time  
39 and sex differences occurring during renal IRI and recovery at gene expression level and offers a template  
40 of translational value for further study of sexual dimorphism in kidney diseases.

41

42 **AUTHOR SUMMARY**

43

44 **Kidneys' correct functioning** is essential for optimal body homeostasis, being their basic functions blood  
45 filtration and excretion of wastes and toxins. Inherited or acquired conditions can cause renal dysfunction  
46 requiring renal replacement therapy, which will affect patients' life quality and survival. A major cause of  
47 kidney failure is **the renal ischemia/reperfusion injury** (IRI), which occurs in many clinical situations like  
48 kidney transplantation or aortic aneurysm surgery. Interestingly, men are more susceptible to IRI than  
49 women, being women more protected against kidney injury. However, the genetics regulating these sex  
50 differences in injury and renal repair remained unknown.

51

52 Here, we provide a novel porcine model to study renal injury and recovery in both males and females. Using  
53 this model, we have identified the gene sets involved in renal injury and recovery processes. Moreover,  
54 global genetic analyses allowed us to discover the temporal and sex-dependent patterns that regulate those  
55 gene sets and, finally, kidney damage and repair. A relevant finding of our study is that males develop a  
56 feminized genetic profile during recovery, which may represent a survival mechanism to diminish the  
57 androgenic pro-damage effects on kidney cells. To sum up, our results provide novel sex-dependent targets  
58 to prevent renal injury and promote kidney recovery.

59

## 60 INTRODUCTION

61

62 Acute kidney injury (AKI) is a common and serious condition with no specific treatment (1) and  
63 worldwide increasing incidence (2). AKI is characterized by a rapid decline of renal function that requires  
64 hospital admission and renal function replacement by dialysis if renal failure is severe, leading to high  
65 mortality rates (over 50%) (3). Although AKI is reversible and allows at least partial recovery of renal function,  
66 repeated AKI episodes increase the risk of subsequent chronic kidney disease (CKD) and cardiovascular  
67 disease long after recovery from the original insult (4–8).

68 Besides infection and toxic drugs, renal ischemia/reperfusion injury (IRI) is a major cause of AKI,  
69 which is faced in many clinical situations such as kidney transplantation, partial nephrectomy, renal artery  
70 angioplasty, aortic aneurysm surgery and elective urological operations (9). In these conditions, IRI initiates  
71 a complex and interrelated sequence of events, resulting in injury and the eventual death of renal cells (9).

72 Sex differences influence susceptibility, progression and response to AKI. Clinically, an increased  
73 mortality rate has been documented among males with acute renal failure (1, 10, 11). In fact, men are more  
74 prone to acute and chronic kidney disease and to progress to end-stage renal disease (ERSD) than women,  
75 when all-cause incidence rates are considered (12). Studies looking at outcomes in AKI patients have found  
76 that sex is an independent predictor of mortality (13–15). Consistent with clinical studies in AKI, animal  
77 research has also shown females are protected against renal IRI (16–18). In consequence, pre-clinical  
78 studies have been preferentially performed in males although, recently, the importance of defining  
79 pathophysiology and disease mechanisms for each sex is increasingly being integrated into biomedical  
80 research.

81 In this study, we have established a renal IRI and recovery model in sexually mature male and  
82 female pigs to analyze biochemical markers, histological lesions and molecular changes occurring in pre-  
83 ischemic, ischemic and post-ischemic conditions. Thorough analyses of kidney transcriptomic data were  
84 performed using Gene Set Enrichment Analysis (GSEA). Besides genes of clinical relevance, gene sets  
85 changing their expression pattern in a sex-dependent manner at different time points (basal, injury and  
86 recovery) and gene sets differentially expressed at the same time points between males and females were  
87 identified. Upon injury, changes in gene set clusters related with immune cell regulation and steroid hormone  
88 response, among others, were more prominent in males than females.

89 Overall, our analysis has brought novel insight into the sex-specific regulation of molecular  
90 pathways involved in IRI and recovery. Thus, this study might serve as a resource to better correlate the  
91 clinical outcome of IRI with underlying molecular processes that could eventually help to design sex-specific  
92 strategies to promote renal regeneration in humans.

## 93 RESULTS

94

### 95 1. Renal ischemia/reperfusion injury (IRI) pig model reveals sex-dependent structural and 96 functional renal changes

97 In order to study the changes in gene expression occurring after ischemia/reperfusion injury (IRI),  
98 we proceeded to generate an IRI model in sexually mature pigs. Previous studies on the effects of warm  
99 ischemia (19, 20) reported that periods greater than 30 minutes can lead to severe kidney damage and  
100 periods longer than 60 minutes irreversible damage. Thereby, ischemic kidney injury was induced in single-  
101 kidney female and male pigs by clamping the renal pedicle for 30 minutes and data was obtained before the  
102 surgery (PR), five minutes after ischemia (PS) and one week later (WL) (schematized in **Figure 1A**). To  
103 confirm our kidney injury–recovery pig model, blood urea nitrogen (BUN) and serum creatinine (SCr) were  
104 measured at basal situation before injury (PR), at 5 min post-reperfusion (PS) and at 24 h (1d), 72 h (3d)  
105 and one-week (WL) post-reperfusion (**Figure 1B**). SCr and BUN reached their highest values at 24 h post-  
106 reperfusion and gradually descended at 3 and 7 days post-surgery for males and females. SCr and BUN  
107 levels at WL showed a tendency to be higher than those at PR indicating that the recovery process was still  
108 ongoing (**Supplementary Table 1**). No major differences were detected between males and females  
109 regarding SCr and BUN levels at any time point (**Figure 1B**). For the scope of this study, we focused on  
110 three time points (PR, PS and WL) for subsequent analyses.

111 Kidney histopathological examination at PR, PS and WL showed near-normal renal morphology  
112 with changes associated with sublethal injury including mild interstitial edema and mononuclear infiltration  
113 as well as tubular injury associated to brush border diminishment (21–23) (**Figure 1C**). To assess if there  
114 was any difference between males and females, we quantified tubular damage (Jablonski scoring system  
115 (SS) (24)) and interstitial mononuclear infiltration. Our data revealed that tubular damage was more  
116 prominent in males than females (Levels 2-3 of Jablonski SS: 40% of males at PS and 20% at WL vs. 0%  
117 of females at PS and WL) (**Figure 1D upper panel**). On the contrary, mononuclear infiltrates (level 1) were  
118 more common in females at PR (40% females vs. 0% males), reached similar incidence for both sexes at  
119 PS (80% in both males and females) and remained present in 60% of the females but not in males at WL  
120 (**Figure 1D lower panel**). Altogether, females present more mononuclear infiltrates than males, both at pre-  
121 surgery and at one-week after reperfusion, while males exhibit more tubular injury than females at PS and  
122 WL. Importantly, according to biochemical and histological parameters, our data indicate that recovery is  
123 still ongoing at 7 days post-reperfusion in both sexes.

124

### 125 2. Kidney transcriptome profiles across injury and recovery in female and male pig samples

126 Next, in order to identify the time- and sex-dependent molecular pathways relevant for IRI and  
127 recovery, we performed a microarray-based gene expression analysis using samples from our IRI pig model.  
128 To investigate major changes in the transcriptional response before, during and after IRI, we performed a  
129 hierarchical clustering of gene expression levels, represented as heatmaps that allowed the identification of

130 common and distinct patterns of regulation between different experimental conditions. In both males and  
131 females, time point comparison revealed a similar gene expression pattern between pre-ischemia (PR) and  
132 post-ischemia (PS), which was radically different one week later (WL) (**Figure 2A**). Interestingly, sex  
133 comparison results indicate that changes in global gene expression observed at PR and PS between males  
134 and females disappear during the recovery phase (WL) (**Figure 2B**), with males exhibiting a global female-  
135 like phenotype during recovery.

136

## 137 **2a. Validation of microarray data by qRT-PCR**

138 In order to assess the reliability of the microarray data, selected genes changing their expression  
139 in a time and sex-dependent manner (*IFIT3*, *FABP5*, *CXCI0*, *CD274*, *RSAD2*) (**Figure 3A**) were analyzed  
140 by qRT-PCR using specific TaqMan probes. Our data show that these genes chosen for the validation  
141 presented a similar pattern as in the microarrays, therefore confirming the trustworthiness of the microarray  
142 data (**Figure 3B**).

143

## 144 **2b. mRNA levels of pig-selected genes relevant for IRI are conserved in humans**

145 In order to study the conservation of the gene expression pattern in humans, selected genes  
146 showing sex-dependent regulation by renal ischemia in pigs (i.e. *IFIT3*, *FABP5*, *CXCL0*, *CD274*, *RSAD2*)  
147 were analyzed in ischemic kidney biopsies from men and women. Briefly, kidney biopsies of normal tissue  
148 were obtained from renal cancer patients of both sexes undergoing nephrectomy. Non-tumoral post-  
149 ischemic tissues were collected after 30 minutes of ischemia, approximately, thus corresponding to the post-  
150 surgery (PS) condition in our pig model. Next, we tested the mRNA levels of the selected genes in these  
151 post-ischemic kidneys of men and women by quantitative PCR (qRT-PCR). Importantly, from the five genes  
152 analyzed, *RSAD2*, *CXCL10* and *CD274* showed the same expression pattern observed in the pig model  
153 (*RSAD2*: men:  $0.8462 \pm 0.1322$ , women:  $0.5015 \pm 0.1036$ ; *CXCL10*: men:  $0.7169 \pm 0.1500$ , women:  $0.4909$   
154  $\pm 0.0917$ ; *CD274*: men:  $1.219 \pm 0.1505$ , women:  $0.7965 \pm 0.0608$ ), while no differences were detected for  
155 *FABP5* or *IFIT3* between sexes (**Figure 3C**). Overall, a partial correlation was found between the mRNA  
156 levels of both species, under ischemic conditions.

157 Altogether, our data suggest that *RSAD2*, *CXCL10* and *CD274* might serve as noninvasive  
158 surrogated biomarkers to predict ischemic injury and recovery in human kidneys.

159

## 160 **2c. Time comparison reveals differentially expressed genes throughout renal IRI**

161 We have analyzed those transcripts altered throughout IRI (up- and down-regulated) to identify  
162 common and exclusive genes for each time point (PR, PS, WL). In males, 174 genes were conserved  
163 between the WL vs. PR and WL vs. PS comparisons, 52 genes were exclusive of WL vs. PS comparison  
164 and 50 genes were only found in the WL vs. PR comparison. From the eight genes that are different between  
165 PS and PR, only two (*LEAP2*, *MIR505*) are exclusive of this comparison (**Figure 4A**). Our results revealed  
166 similar patterns for each comparison in females, although lesser genes were altered compared to males.

167 Specifically, 59 genes were conserved between the WL vs. PR and WL vs. PS comparisons, 19 genes were  
168 exclusive of WL vs. PS comparison and 37 genes were only found in the WL vs. PR comparison (**Figure**  
169 **4B**). Interestingly, one gene (*FOS*) was shared between the WL vs. PR and the PS vs. PR comparisons.  
170 Finally, from the eight genes differentially expressed between PS and PR, four are specific for this  
171 comparison (*NKL*, *KLF5*, *DNAJB1* and *CPE*).

172         Altogether, our data suggest that renal injury and recovery processes have a lower impact in  
173 females than males. The overall number of differentially expressed genes in renal IRI and recovery in male  
174 and female pig kidneys are reported in the supplementary figure 1 (adj. p-value  $\leq 0.25$ , without considering  
175 the fold change, **supplementary figure 1**).

176

## 177         **2d. Sex comparison of gene expression during renal injury and repair**

178         Fifty-one of the 53 differentially expressed genes between sexes at basal (PR) remained  
179 unchanged after injury (PS), while 109 genes changed in males during this phase (**Figure 4C**). It is very  
180 relevant to state that all gene expression changes found between males and females at PR and PS  
181 disappeared at WL and only two genes, *SLC51A* and *DHRS7*, were differentially expressed between sexes  
182 in this phase. The number of differentially expressed genes throughout renal IRI and recovery between  
183 males and females at the same time point are reported in supplementary figure 2 (adj. p-value  $\leq 0.25$  without  
184 considering the fold change, **supplementary figure 2**).

185

## 186         **3. Role of androgens in the regulation of differentially expressed genes (DEG) during IRI**

187         Our results showed a clear difference in gene expression between males and females during IRI  
188 and recovery process, thus we postulated that sexual hormones might have a role. To better assess it, we  
189 compared the gene expression profile of the top DEG between male and female pigs over IRI with data from  
190 a single castrated male (CM) using the Ingenuity Pathways Analysis (IPA) software. Interestingly, the CM  
191 sample, which was not included in the enrichment pathway analyses, phenocopies the gene expression  
192 pattern of females at basal conditions (PR) (**Figure 5A**). Moreover, the CM does not completely follow the  
193 gene expression pattern of males at PR and WL (**Figure 5B**). Specifically, genes that follow a putative  
194 androgen-dependent expression in PR (i.e. *UBD*, *IFIT3*, *CXCL11*, *FBG*, *FGG*, *MX1*, *IFIT1* and *CXCL10*)  
195 show an opposite direction at WL between males and CM. On the other hand, those that are common  
196 between males and CM (i.e. *CKAP2*, *CENPF*, *CDC20*, *KIF20A*, *CCNA2*, *EPHB3*, *C6*, *SLC6A19* and *FABP5*)  
197 in PR, retain the same pattern of expression at WL. These results suggest that androgens and male sexual  
198 hormones may contribute to the sexual dimorphic expression pattern observed at basal conditions, in renal  
199 injury and during recovery.

200

## 201         **4. Gene Set Enrichment Analysis (GSEA) reveals the importance of immune system related** 202 **pathways during the recovery process in males.**

203 Our study has identified differentially expressed genes (DEG) between female and male pig  
204 kidneys at basal conditions (PR), injury (PS) and recovery (WL). To gain mechanistic insight into time- and  
205 sex-related differences that govern renal injury and recovery processes, we aimed to identify which  
206 biological pathways are differentially expressed between groups using Gene Set Enrichment Analysis  
207 (GSEA).

208 As an example of the GSEA, here we show the comparison between males and females at one-  
209 week post reperfusion (M.WL vs. F.WL). For this particular comparison, the GSEA showed that over-  
210 represented clusters (in red) in males include: regulation and production of cytokines and interleukins,  
211 immune somatic recombination, microtubule cytoskeleton organization, actin organization and mitotic cycle  
212 transition. On the other hand, under-represented clusters (in blue) contain nodes related with metabolism of  
213 fatty acids and steroid hormones, nucleotide biosynthetic processes, amino acid catabolism and response  
214 to xenobiotic stimulus, amongst others (**Figure 6A**). Moreover, deeper analysis of each of these nodes led  
215 to specific gene sets. For instance, the somatic recombination immune node (up-regulated) includes gene  
216 sets like lymphocyte activation or B-cell differentiation; while the down-regulated node of fatty acids and  
217 steroid hormones includes metabolism of steroids or metabolism of lipids (**Figure 6B**). We performed the  
218 same analysis for the other sex and time comparison before, after injury and during recovery. The lists of  
219 10 top up- and down-regulated gene sets enriched for each comparison are reported in the **supplementary**  
220 **tables 2-10**. Overall, our results revealed the sex-specific regulation of gene sets upon IRI.

221

## 222 **5. Grouped enrichment analyses of sex and time comparisons show the gene sets** 223 **controlling renal injury and recovery**

224 Besides individual comparisons and to get insight into the overall processes, we performed  
225 grouped comparison visualization of the enrichment analyses. Heatmaps including the six time comparisons  
226 (F.PS vs. F.PR; FWL vs. F.PS; F.WL vs. F.PR; M.PS vs. M.PR; M.WL vs. M.PS; M.WL vs. M.PR) or the 3  
227 sex comparisons (M.PR vs. F.PR, M.PS vs. F.PS, M.WL vs. F.WL) were created. The addition of multiple  
228 comparisons in a single enrichment map hindered an effective visualization of gene sets involved in chosen  
229 clusters. Nine clusters containing high numbers of gene sets, which revealed their prominence in the  
230 processes under study, were selected from the enrichment maps. The NES (normalized enrichment score)  
231 value of each of the gene sets included in the nine clusters were indicated in heatmaps. The nine clusters  
232 are: (I) immune cell regulation, (II) morphogenesis development migration, (III) ion transport  
233 transmembrane, (IV) apoptotic intrinsic extrinsic, (V) oxygen levels hypoxia, (VI) alcohol biosynthetic  
234 process, (VII) steroid hormone response, (VIII) regulation hormone secretion and (IX) phagocytosis  
235 endocytosis and invagination. Interestingly, the regulation of gene sets of a distinct cluster varies amongst  
236 different comparisons (examples in **Figure 7A** and **Figure 8A**).

237

### 238 **5a. Grouped GSEA analyses reveal different temporal gene set regulation patterns after** 239 **renal IRI and recovery**

240 Heatmaps representing gene sets of previously selected clusters (for instance, the Immune cell  
241 regulation cluster shown in **Figure 7A**) allowed the visualization of five prominent temporal patterns of  
242 expression that are schematically represented in **Figure 7B**. To simplify our analysis, we focused on gene  
243 sets that are over-regulated, assuming that this leads to higher activity of those genes involved in IRI events.  
244 Importantly, gene sets from the nine clusters can follow different or similar temporal patterns revealing  
245 coordinated expression (**Figure 7B** and **tables 1 to 5**). The five temporal patterns that we have identified  
246 are (**Figure 7C**):

247

248 1. **Pattern 1** includes gene set clusters that are over-represented during the recovery process in  
249 females (WL vs. PS) and in the injury process in males (PS vs. PR) (see **Table 1** for complete gene sets  
250 included in pattern 1).

251 2. **Pattern 2** is composed of pathways over-represented during the recovery process (WL vs. PS)  
252 in females but never found in males (**Table 2**).

253 3. **Pattern 3** includes gene sets that are only over-represented in males during injury (PS vs. PR)  
254 (**Table 3**).

255 4. **Pattern 4** is composed of gene sets over-represented during the recovery process (WL vs. PS)  
256 and at one-week post-reperfusion (WL vs. PR) in females; and also over-represented only during injury in  
257 males (PS vs. PR) (**Table 4**).

258 5. **Pattern 5** involves pathways that are over-represented only during injury in both sexes (PS vs.  
259 PR) (**Table 5**).

260

#### 261 **5b. GSEA analyses reveal four sex-dependent gene set regulation patterns**

262 Finally, we have created heatmaps for the sex comparison (for example, for the immune cell  
263 regulation cluster shown in **Figure 8A**), which revealed four prominent sex-dependent patterns (from A to  
264 D) schematically shown in **Figure 8B**. We performed the same type of analysis as for time comparison to  
265 regroup the gene sets and clusters that shared similar expression pattern (**Tables 6 to 9**) (**Figure 8C**).

266 - **Pattern A** includes gene sets that are up-regulated in males vs. females both at basal conditions  
267 (PR) and after injury (PS) (**Table 6**).

268 - **Pattern B** includes over-represented gene sets in males at injury (PS) (**Table 7**).

269 - **Pattern C** includes pathways over-represented in males at injury (PS) and after one-week  
270 reperfusion (WL) (**Table 8**).

271 - **Pattern D** is followed by pathways over-activated in males one week after reperfusion (**Table 9**).

272

273



## 274 **DISCUSSION**

275

276 Ischemia is the most common etiology for acute kidney injury (AKI) and one of the main contributors  
277 to morbidity and mortality in the hospital setting, as it affects 1 out of 5 patients in emergency admissions  
278 (25). Experimental studies have also shown that AKI is associated with mild-to-moderate acute injury in  
279 organs distant from the kidney such as the liver, lung or brain therefore precipitating or aggravating other  
280 conditions that may have significant impact on patients' morbidity and life expectancy (26). The initiating  
281 insult might be irreversible but, in many cases, timely intervention to restore renal perfusion may mitigate  
282 the severity of evolving ischemic AKI, by preventing still functioning tissue from progressing to overt injury.  
283 AKI occurrence also displays sex differences, men being generally more prone to suffer from AKI, to  
284 progress more frequently to chronic kidney disease (CKD) and to end stage-renal disease (ESRD) (27).

285

### 286 **Novel renal Ischemia/Reperfusion Injury (IRI) pig model**

287 Pigs represent the gold standard model for renal transplantation research and studies involving IRI  
288 in tubule interstitial fibrosis development. Pigs present advantages over other animal models because their  
289 similarities with humans (e.g. genome, size, metabolism and renal anatomy) (28, 29), being some  
290 biochemical parameters identical (e.g. Scr and BUN) (24, 25). Importantly, the size of their kidney allows  
291 sample collection at different time points from same animal, overcoming the individual variability and  
292 disparity that might occur in rodents.

293 Our IRI pig model presents the highest SCr and BUN values, markers of renal injury, at 24 hours  
294 post-reperfusion in both males and females. Their levels gradually descend and remain slightly elevated  
295 seven days after injury, which indicates an ongoing recovery process. This reproduces the course of  
296 ischemic AKI observed in patients, where the process from insult to first evidence of recovery takes between  
297 7 and 21 days (25). Although both sexes showed similar levels of SCr and BUN, kidney histopathological  
298 examination revealed sublethal injury with higher mononuclear infiltrates in females than males. These data  
299 correlate with the immune response sexual dimorphic pattern observed in humans (31). On the other hand,  
300 tubular injury associated to brush border diminishment was still present in males at 7 days post-injury. This  
301 indicates that the renal recovery after IRI is delayed in males compared to females, suggesting a role for  
302 sexual hormones in this process.

303

### 304 **Identification of sexual dimorphism in the time-specific gene expression controlling renal** 305 **IRI and recovery**

306 The first key result of this IRI pig model is that males exhibit stronger global gene expression  
307 changes during injury and recovery than females. It is striking the opposite expression pattern observed in  
308 males compared to females even at basal (PR) or during injury (PS), which is completely reversed with  
309 males acquiring a female-like gene expression pattern at 7 days post-surgery (WL). Altogether, these data  
310 point to a clear role for the sexual hormones in the protection against IRI and recovery after renal injury.

311 Only two genes (*SLC51A* and *DHRS7*) remain differentially expressed at 7-day post-surgery between males  
312 and females. *DHRS7* encodes for the seventh member of the short-chain dehydrogenases/reductases  
313 (SDR) family, which metabolize many different compounds, including steroid hormones (32). *SLC51A*  
314 encodes the alpha subunit of the organic solute transporter alpha/beta (OST $\alpha/\beta$ ), which is a heteromeric  
315 solute carrier protein that transports bile acids, steroid metabolites and drugs into and out of cells (33). The  
316 differential regulation between sexes of genes that metabolize and transport sex steroid hormones during  
317 recovery suggests a link between their expression and renal repair after injury.

318 Amongst the genes with differential expression between females and males at basal conditions or  
319 during injury, but exhibiting similar levels during recovery, the ones with the highest differences are those  
320 related with immune and inflammatory processes. For example, interferon signaling pathways related genes  
321 (*MX1*, *IFIT3* and *GBP1*), interferon responding genes (*CXCL9*, *CXCL10* and *CXCL11*), programmed cell  
322 death 1 ligand 1 (*PDL1/CD274*), inflammatory response protein 6 (*IRG6/RSAD2*) and a protease that  
323 cleaves complement components *C2* and *C4* (*MASP2*) (34). All these genes are strongly and significantly  
324 overexpressed in males compared to females at basal conditions or right after injury, with no differences at  
325 seven-days post-injury indicating that they acquire a female-like expression phenotype.

326 Nevertheless, albeit presenting similar expression of immune related genes at recovery, the  
327 histopathological analysis shows higher mononuclear infiltrate in females. A possible explanation is that  
328 same ligands can have different effects depending on the cell type. For instance, chemokines *CXCL9*,  
329 *CXCL10* and *CXCL11* are ligands of the *CXCR3* receptor and play important roles in the activation and  
330 stimulation of the immune system against foreign antigens (35). However, *CXCR3* positive T regulatory  
331 (Treg) cells infiltration are beneficial for proper kidney allograft function (36). This dual effect could explain  
332 why females are more protected against IRI than males. One of the limitations of our study has been the  
333 poor performance of available antibodies to detect pig proteins by WB and IHQ assays, thus enabling us to  
334 correlate differential gene expression with immune cell infiltrates in kidney tissues.

335

### 336 **Role of sexual hormones in the regulation of IRI and renal recovery controlling genes**

337 Our data showed that the expression pattern of putative sex-regulated genes in the castrated male  
338 was closer to females than males, confirming the impact of male sexual hormones on IRI and recovery. This  
339 is the case, for example, for *FABP5*, *CD274*, *IFIT3* and *CXCL10* genes, likely indicating the androgen-  
340 dependent regulation of their expression. In fact, *FABP5* has been found to be a potential therapeutic target  
341 in prostate cancer, an androgen-dependent cancer type (37). Moreover, androgens have been shown to up-  
342 regulate *CXCL10* expression in prostate epithelial cells (38).

343

### 344 **Comparison between humans and pigs data: PDL1 as a candidate**

345 An important part of our study was to prove the correlation between pigs and humans, so our  
346 discoveries could be used to treat renal IRI. Our data from human samples show that the expression levels  
347 of *CXCL10*, *RSAD2* and *CD274* (*PDL1*) are lower in females than males, similar to what was observed in

348 our pig model. Amongst them, CD274/PDL1 is one of the most interesting candidates. This protein is a  
349 ligand of PD-1, a negative co-stimulatory molecule expressed by T lymphocytes, monocytes, dendritic cells,  
350 and B cells (39). The interaction between PD-1 and PDL1, present on antigen-presenting cells and tumor  
351 cells, constitutes an immune checkpoint through which tumors can induce T-cell tolerance and avoid  
352 immune destruction (39). It appears that PDL1 on non-immune cells participates in Treg-mediated protection  
353 against kidney IRI and AKI (40). However, further research is required to study how PDL1 lower levels in  
354 females can protect them against injury.

355

### 356 **Time and sex-dependent IRI and repair pathways**

357 Besides individual genes, our -omics data allowed the identification of clusters containing gene  
358 sets relevant for processes associated with renal IRI and recovery, providing evidence of their sex- and  
359 temporal-regulated fashion.

360

#### 361 a) Sex and time comparison of gene sets of most prominent clusters

362 Here we have identified **five temporal patterns** for different gene clusters and **four sex-**  
363 **dependent patterns**. The behavior of these temporal and sex-dependent patterns is summarized in **Figure**  
364 **7C and Figure 8C**. First, early after IRI (PR to PS), genes following pattern 5 are activated in both males  
365 and females, but males also specifically activate the genes following pattern 3. Interestingly, pattern 1 and  
366 pattern 4 include genes expressed after injury in males, but one week later (recovery) in females. Finally,  
367 the pattern 2 is specific for females one week after the injury. In order to understand the meaning of this  
368 temporal and sex-dependent regulation, as well as the clusters activated at each time point, we propose the  
369 following:

370 In the early phases of renal IRI, reduced oxygen supply to metabolically active tubular epithelial  
371 cells lowers oxidative metabolism and depletes cell supplies of high-energy phosphate compounds.  
372 Reperfusion restores the oxygen supply, which results in mitochondrial impairment, enhances oxygen free  
373 radicals formation and, therefore, causes more injury (41). Interestingly, males and females react differently  
374 to this situation. Males activate gene sets in response to a decrease in oxygen levels and hypoxia (**Pattern**  
375 **3**), while females show negative regulation of angiogenesis during the recovery phase (**Pattern 2**).  
376 Altogether, our data likely indicate that males suffer more from the lack of oxygen than females.

377 Tubular epithelial cell apoptosis is the key pathophysiological alteration occurring in IRI, and  
378 defines the extent of the damage to kidney function (41). This process mainly occurs through the intrinsic  
379 pathway (42) by p53, which is highly activated in males at both basal and injury conditions (**Pattern A**),  
380 suggesting that males are preferentially affected by apoptotic damage. This fits well with the  
381 histopathological results showing more tubular injury associated to brush border diminishment in males than  
382 females. Androgens are known to inhibit apoptosis and promote growth (43, 44). However, upon cellular  
383 stress, they can also promote stress-mediated apoptosis by enhancing mitochondrial translocation of the

384 proapoptotic protein Bax, which plays a critical role in the intrinsic apoptotic pathway via mitochondrial  
385 membrane permeabilization (45).

386 Another process leading to tubular epithelial cell death is necrosis. Necrotic cell death is  
387 accompanied by the release of immunogenic cellular components collectively known as damage-associated  
388 molecular patterns (DAMPs), which cause severe tissue damage, leading to systemic inflammation (46).  
389 Apoptosis and regulated necrosis can occur at the same time in the same kidney compartment, as they are  
390 not mutually exclusive and coexist in many renal pathological conditions (41). Gene sets related with necrotic  
391 cell death are upregulated in females during recovery (**Pattern 2**), occurring later than apoptosis in males.  
392 Interestingly, our results point to sex hormones as a relevant factor pushing towards apoptosis or necrosis  
393 in front of the same trigger and intensity event.

394 During IRI, both sexes activate gene sets related with DNA damage, the innate immune response,  
395 T cell activation, cytokine secretion and cell cycle arrest, which are downregulated during recovery (**Pattern**  
396 **5**). Together with tubular epithelial cells, macrophages produce proinflammatory cytokines, thus contributing  
397 to injury. Gene sets and clusters controlling these pathways are preferentially upregulated in males (**Pattern**  
398 **3**). Besides, males also present enhanced activation of pro-inflammatory pathways (e.g. *TNF alpha* and  
399 *IFN $\gamma$*  production, *NFKB* signaling and complement cascade) not only during injury but also at basal situation  
400 (**Pattern A**). Concomitantly, negative regulation of MAP kinase activity and positive regulation of hormone  
401 metabolism processes also occur in both sexes, contributing to the reestablishment of cellular homeostasis.

402 Although the immune response has an important role during these processes for both sexes, gene  
403 sets involved on immune cell regulation, mononuclear cell migration, leukocyte chemotaxis, phagocytosis  
404 and engulfment are activated at different time points in males and females. Genes following patterns 1 and  
405 4 are active at injury in males but enhanced in females during recovery, which correlates with the apoptotic  
406 and necrotic events occurring in males and females at these time points, respectively. Our histology data  
407 also revealed higher mononuclear infiltrates in females at recovery, which is in agreement with gene sets  
408 following **pattern 2** (upregulated in females during recovery) controlling inflammatory response, TNF alpha  
409 production, humoral response and adaptive immune responses. These processes are even clearer when  
410 we compare male and female at the same time points, which reveals that genes related to phagocytosis are  
411 more activated in males at injury and during recovery (**Pattern C and Pattern D**).

412 The renal tubular epithelium has a huge capacity for regeneration after injury. During the repair  
413 process, surviving tubular cells actively proliferate and differentiate into mature tubular cells to reconstruct  
414 their functional structures. Regeneration of the tubular system is essential for recovery from AKI and a clear  
415 marker of patient morbidity (41). The clinical end-point of abnormal repair is chronic kidney disease that is  
416 reflected, histologically, by tubular atrophy and renal fibrosis due to myofibroblast proliferation and  
417 deposition of extra-cellular matrix (25). Regeneration involves actions of endogenous inhibitors of  
418 inflammation, up-regulation of repair genes, actions of the immune system, clearance of necrotic and  
419 apoptotic cells and tubular regeneration (25). Gene sets regulating these pro-regenerative processes  
420 through the immune system are activated one week after the injury in our model, especially in females

421 **(Pattern 4)**. We also observed that gene sets related to extra-cellular matrix and cellular migration are  
422 upregulated in males during injury **(Pattern 3)**, which indicates an effort to replace lost cells to repair the  
423 tubular system, a phenomenon that usually occurs within less than a week (41).

424 As shown by gene sets included in **Pattern C**, males show a positive regulation of Wnt signaling  
425 pathway, endocytosis and engulfment at injury and during recovery, likely reflecting that injury has a stronger  
426 effect in males. It is also apparent a negative regulation of the intrinsic apoptotic pathway during injury  
427 **(Pattern B)** possibly due to the induction of EMT (epithelial-mesenchymal transition) in males **(Pattern 3)**.  
428 The EMT activation together with increased epithelial and endothelial cell proliferation that occurs in males  
429 during injury and recovery **(Pattern C)** might allow males to recover from the ischemic insult. Moreover, the  
430 migratory capacity provided by EMT enables these transitional cells to invade the basement membrane and  
431 repopulate the injured tubules (47). **Pattern D** shows that males at recovery exhibit augmented  
432 transcriptional programs related with endothelial cell migration and differentiation, kidney development,  
433 morphogenesis and epithelium recovery, associated to the activation of canonical and non-canonical Wnt  
434 signaling. Activation of Wnt/ $\beta$ -catenin seems to be instrumental for tubular repair and regeneration after AKI,  
435 recapitulating the role of Wnt signaling in kidney embryonic development (48).

436

## 437 **Conclusions**

438

439 Our results show that sex hormone have an impact on the type of gene sets regulated in the kidney  
440 during IRI and recovery and also on the timing of their activity. Steroid biosynthesis, hormone secretion and  
441 hormones transport are up-regulated in males compared to females in basal conditions and after injury.  
442 These differences are abolished one-week after injury, fitting with the feminized gene expression pattern  
443 shown by males during recovery, which might likely represent a survival mechanism to diminish androgen  
444 promotion of stress-mediated apoptosis. Altogether, our study provides a template to further characterize  
445 renal IRI in a temporal and sex specific manner that might bring us one step closer to the development of  
446 effective treatment strategies for kidney diseases in the human population.

447

448

## 449 MATERIALS AND METHODS

450

### 451 Animals

452 This study was conducted using farm pigs, hybrids between Large White and Landrace. Five  
453 females, five males and one castrated male of four months old, free of specific pathogens, between 30–40  
454 kg of weight were included in this study. This age range was chosen due to the sexual maturity of the animal,  
455 allowing hormone effects. All animal care and procedures were performed in accordance with the  
456 requirements of the European laws on the protection of animals used for scientific and experimental  
457 purposes (86/609 EEC), and has the approval by the Experimental Ethics Committee of the Vall d'Hebron  
458 Institute of Research (VHIR) (34/08 EAEC).

459

### 460 Experimental design

461 On the first surgical day all pigs underwent left nephrectomy. On the second day (one week later),  
462 the right kidneys were subjected to 30 minutes of warm arterial ischemia followed by 5 minutes of reperfusion  
463 and allowed for seven days of recovery (**Figure 1A**). Overall, three kidney biopsies were collected for each  
464 animal: prior to injury (PR), 5 minutes following 30 minutes of ischemia (PS) and one week after ischemia  
465 (WL). In addition to tissues, blood samples were collected at the different time points of the experiment  
466 including 1 and 3 days following ischemia.

467

### 468 Assessment of renal injury by serum analysis

469 Creatinine and urea serum levels were analyzed on blood samples obtained through the  
470 cannulation of the carotid artery and the internal jugular vein (placed during the first surgery). The catheters  
471 subcutaneously tunneled were kept until the end of the experiment for each animal. The determination of  
472 serum creatinine was performed by the buffered kinetic reaction of Jaffe (diagnostic system of Boehringer  
473 Mannheim) with a Roche / Hitachi 917 system. Serum urea determination was performed by extracting 3 ml  
474 of blood with heparin to extract plasma (GD kinetic UV, Human, No. 10521). Measures were taken with a  
475 Cobas Mira Plus®6 autoanalyzer and a Hitachi 4020® spectrophotometer.

476

### 477 Assessment of renal injury by histological examination

478 All animals underwent baseline renal biopsies followed by subsequent biopsies just after ischemia  
479 and one-week after injury. Samples were prepared by 10% formalin fixation and paraffin embedding,  
480 followed by staining with hematoxylin and eosin and Periodic acid–Schiff. A blinded pathologist using  
481 standard light microscopy assessed the degree of lesions at the tubular and interstitial level of all biopsy  
482 samples. The epithelial tubular affectation was scored as follow: 0: absence or dilation with reduction of the  
483 brush border; 1: proximal vacuolization with some isolated necrotic cell; 2: proximal vacuolization with  
484 disseminated necrotic cells; 3: proximal vacuolization with groups of necrotic cells. The Interstitial affection  
485 was score thereby: 0: absence of inflammatory infiltrate or <10% of parenchyma; 1: inflammatory infiltrate

486 10-25% of the parenchyma; 2: Inflammatory infiltrate 25-50% of the parenchyma; 3: Inflammatory infiltrate >  
487 50% of the parenchyma.

488

#### 489 **Microarray experiment**

490 RNA was extracted from the PR, PS and WL kidney biopsies from each animal. The extractions  
491 were performed starting from 50 mg of each biopsy performed with the NZyol Kit following manufacturer  
492 instructions (Nzytech genes & enzymes). Microarray hybridization was carried out at High Technology Unit  
493 (UAT) at VHIR. RNA integrity was assessed by Agilent 2100 Bioanalyzer (Agilent, Palo Alto, Ca). Only  
494 samples with similar RNA integrity number were accepted for microarray analysis. Gene Titan Affymetrix  
495 microarray platform and the Genechip Porcine Gene 2.1 ST 16-Array plate were used for this experiment.  
496 This array analyzes gene expression patterns on a whole-genome scale on a single array with probes  
497 covering many exons on the target genome, and thus permitting expression summarization at the exon level  
498 or gene level. Starting material was 200 ng of total RNA of each sample. Briefly, sense ssDNA suitable for  
499 labeling was generated from total RNA with the GeneChip WT Plus Reagent Kit from Affymetrix (Affymetrix,  
500 Santa Clara, CA) according to the manufacturer's instructions. Sense ssDNA was fragmented, labeled and  
501 hybridized to the arrays with the GeneChip WT Terminal Labeling and Hybridization Kit from the same  
502 manufacturer.

503

#### 504 **Microarray data analysis**

505 All microarray data in this publication have been deposited in NCBI's Gene Expression Omnibus  
506 (49, 50) and are accessible through GEO Series accession number GSEXXXX (<http://www.ncbi.nlm.nih.gov/geo/query/acc.cgi?acc=GSEXXXX>). Bioinformatic analysis was performed at the Statistics  
507 and Bioinformatics Unit (UEB) at VHIR. Robust Multi-array Average (RMA) algorithm (51) was used for pre-  
508 processing microarray data. Background adjustment, normalization and summarization of raw core probe  
509 expression values were defined so that the exon level values were averaged to yield one expression value  
510 per gene. The analysis was done considering the experimental factors (time points and sex) and taking into  
511 account the pairing between samples in most of the comparisons performed. Data were subjected to non-  
512 specific filtering to remove low signal and low variability genes. Conservative thresholds were used to reduce  
513 possible false negative results. This yields a list of 3435 genes to be analyzed. Selection of differentially  
514 expressed genes was based on a linear model analysis with empirical Bayes modification for the variance  
515 estimates (52). This method is similar to using a 't-test' with an improved estimate of the variance. To  
516 account for multiple testing, P-values were adjusted to obtain stronger control over the false discovery rate  
517 (FDR), as described by the Benjamini and Hochberg method (53). Genes with adjusted P-value below 0.05  
518 and absolute value of log<sub>2</sub> fold change over 1 were called differentially expressed.

520

#### 521 **Quantitative Reverse-transcription polymerase chain reaction (qRT-PCR)**

522 Microarray experiments were validated by qRT-PCR experiments. Up to 2 µg of total RNA was  
523 retro-transcribed using the High Capacity RNA-to-cDNA Master Mix (Applied Biosystems) and used to  
524 perform quantitative gene expression analyses using TaqMan® Gene Expression Master Mix (Applied  
525 Biosystems). qPCR was performed in a 7900HT Fast Real Time PCR system (Applied Biosystems, Inc.)  
526 These specific TaqMan probes were used: *IFIT3* (Ss04248506\_s1); *FABP5* (Ss03392150\_m1); *CXCL10*  
527 (Ss03391845\_g1); *CD274* (Ss03391947\_m1) and *RSAD2* (Ss03381589\_u1). To confirm the use of equal  
528 amounts of RNA in each reaction, all samples were examined in parallel for beta-actin (Ss03376160\_u1).  
529 Triplicate PCR amplifications were performed for each sample. mRNA levels of human ischemic kidney  
530 biopsies were also measured at the same conditions. Non-tumoral post-ischemic renal tissues from 10 men  
531 and 9 women (36 to 83 years old) undergoing nephrectomy for renal cancer treatment were collected after  
532 30 minutes of ischemia, thus corresponding to the post-surgery (PS) condition in our pig model. Specific  
533 TaqMan probes were used: *IFIT3* (Hs01922752\_s1); *FABP5* (Hs02339439\_g1); *CXCL10*  
534 (Hs00171042\_m1) *CD274* (Hs00204257\_m1) and *RSAD2* (Hs00369813\_m1) for qRT-PCR experiments.  
535 To confirm the use of equal amounts of RNA in each reaction, all samples were examined in parallel for  
536 beta-actin (Hs01060665\_g1).

537

#### 538 **Ingenuity Pathway Analysis (IPA)**

539 Ingenuity Pathway Analysis (IPA) to study the microarray data was conducted using the Qiagen  
540 software (<https://digitalinsights.qiagen.com/>). In our study, IPA was used to detect and overlap the most  
541 significant regulated genes across different time and sex comparisons. A distinct data-filtering criterion was  
542 set: a log fold change cut-off of  $\pm 0.5$ . An individual analysis was performed for each comparison and the  
543 top 10 genes up- and down-regulated were reported. Their expression was represented in heatmaps.

544

#### 545 **Gene Set Enrichment Analysis (GSEA) based pathway enrichment analysis**

546 Pathway enrichment analysis was carried out by searching for enriched gene sets (e.g. pathways,  
547 molecular functional categories, complexes) for the different microarray comparisons using GSEA as  
548 previously described (54) and depicted in Figure Supp3. The pathway gene set definition (GMT) files loaded  
549 on the software were created with the archived instance of g:Profiler (Ensembl 93, Ensembl Genomes 40  
550 (rev 1760, build date 2018-10-02) with a p-value cutoff: 0.01 for the microarray files. We used “gene set  
551 permutation” with 200 permutations to compute p-values for enriched gene-sets, followed by GSEA’s  
552 standard multiple testing correction.

553

#### 554 **Enrichment Map pathway analysis visualization**

555 The resulting enrichment results were visualized with the Enrichment Map plugin for the Cytoscape  
556 network visualization and analysis software. We loaded GSEA individual dataset using a FDR threshold  
557 between 0.01 and 0.1. A multi-dataset enrichment map comprising all comparisons was created with a FDR  
558 of 0.25. In the enrichment maps, each gene set is symbolized by a node in the network. Node size



559 corresponds to the number of genes comprising the gene-set. The enrichment scores for the gene-set are  
560 represented by the node's color (red indicates up-regulation, blue represents down-regulation). To identify  
561 redundancies between gene sets, the nodes are connected with edges if their contents overlap by more  
562 than 50%. The thickness of the edge corresponds to the size of the overlap. The 3.7.1 Cytoscape version  
563 (55) was used with the following apps: EnrichmentMap (54, 56), clusterMaker2 (57), WordCloud, (58),  
564 NetworkAnalyzer(59) and AutoAnnotate (60). Pathways are shown as circles (nodes) that are connected  
565 with lines (edges) if the pathways share many genes. Nodes are colored by ES, blue and red meaning down  
566 and up-regulated pathways, respectively. Edges are sized on the basis of the number of genes shared by  
567 the connected pathways. Network layout and clustering algorithms automatically group similar pathways  
568 into major biological themes. The EnrichmentMap software takes as input a text file containing pathway  
569 enrichment analysis results and another text file containing the pathway gene sets used in the original  
570 enrichment analysis. Gene sets were also visualized by heatmaps using online Heatmapper tool (61).

571

## 572 **Statistics**

573 Results were expressed as the mean  $\pm$  standard error of the mean (SEM). Student's t-test (two-  
574 tailed) was used for statistical analysis. A P value of less than 0.05 was considered to indicate statistically-  
575 significant differences. Statistical analyses were made with commercially available software (GraphPad  
576 Prism, version 6.00 for Windows, GraphPad Software, La Jolla California USA). Bioinformatic Analysis was  
577 performed using the free R and Bioinformatic software.

578

579

## 580 **Author Contributions**

581

582 SN, LC, AM, and JM contributed to conception and experimental design; LC performed IRI  
583 surgeries; SN, LC, DR, MES, MA, AS MF, JM and AM performed data acquisition or data analysis; and SN,  
584 GCR and AM prepared the manuscript, incorporating comments from other authors.

585

## 586 **Acknowledgements**

587

588 We thank all members of the Renal Physiopathology Group for valuable discussions. DNA  
589 microarray and the bioinformatics analysis were carried out by the Statistics and Bioinformatics Unit (UEB)  
590 of the Vall d'Hebron Research Institute (VHIR). This work reflects only the authors' views, and the EU  
591 Community is not liable for any use that may be made of the information contained therein.

592

## 593 **Funding**

594

595 This work was supported in part by grants from Ministerio de Economía y Competitividad  
596 (SAF2014- 59945-R and SAF2017-89989-R to A. Meseguer), Red de Investigación Renal (REDinREN)  
597 (12/0021/0013 to A. Meseguer). Meseguer's research group holds the Quality Mention from the Generalitat  
598 de Catalunya since 2005.

599

## 600 **Conflict of Interests**

601

602 The authors declare that they have no conflict of interests.

603

## 604 **REFERENCES**

605

- 606 1. Bellomo R, Kellum JA, Ronco C. Acute kidney injury . *Lancet* 2012;380(9843):756–766.
- 607 2. Lameire N, Van Biesen W, Vanholder R. The changing epidemiology of acute renal failure . *Nat. Clin. Pract.*  
608 *Nephrol.* 2006;2(7):364–377.
- 609 3. Bonventre J V., Yang L. Cellular pathophysiology of ischemic acute kidney injury . *J. Clin. Invest.*  
610 2011;121(11):4210–4221.
- 611 4. Chawla LS, Eggers PW, Star RA, Kimmel PL. Acute kidney injury and chronic kidney disease as interconnected  
612 syndromes. *N. Engl. J. Med.* 2014;371(1):58–66.
- 613 5. Coca SG, Singanamala S, Parikh CR. Chronic Kidney Disease after Acute Kidney Injury: A Systematic Review  
614 and Meta-analysis. *Kidney Int.* 2012 Mar;81(5):442-8
- 615 6. Hobson CE et al. Acute kidney injury is associated with increased long-term mortality after cardiothoracic surgery.  
616 *Circulation* 2009;119(18):2444–2453.
- 617 7. Martin-Sanchez D et al. Targeting of regulated necrosis in kidney disease. *Nefrologia* 2018;38(2):125–135.
- 618 8. Rifkin DE, Coca SG, Kalantar-Zadeh K. Does AKI truly lead to CKD? . *J. Am. Soc. Nephrol.* 2012;23(6):979–984.
- 619 9. Ferenbach DA, Bonventre J V. Mechanisms of maladaptive repair after AKI leading to accelerated kidney ageing  
620 and CKD . *Nat. Rev. Nephrol.* 2015;11(5):264–276.
- 621 10. Sanz AB, Santamaría B, Ruiz-Ortega M, Egido J, Ortiz A. Mechanisms of renal apoptosis in health and disease .  
622 *J. Am. Soc. Nephrol.* 2008;19(9):1634–1642.
- 623 11. Ashkenazi A, Dixit VM. Death receptors: Signaling and modulation . *Science (80- )*. 1998;281(5381):1305–1308.
- 624 12. Collins AJ, Foley RN, Gilbertson DT, Chen SC. United States Renal Data System public health surveillance of  
625 chronic kidney disease and end-stage renal disease. *Kidney Int. Suppl.* 2015;5(1):2–7.
- 626 13. Mehta RL, Pascual MT, Gruta CG, Zhuang S, Chertow GM. Refining predictive models in critically ill patients with  
627 acute renal failure. *J. Am. Soc. Nephrol.* 2002;13(5):1350–7.
- 628 14. Paganini EP, Halstenberg WK, Goormastic M. Risk modeling in acute renal failure requiring dialysis: The  
629 introduction of a new model . *Clin. Nephrol.* 1996;46(3):206–211.
- 630 15. Chertow GM et al. Predictors of mortality and the provision of dialysis in patients with acute tubular necrosis. The  
631 Auriculin Anaritide Acute Renal Failure Study Group. *J. Am. Soc. Nephrol.* 1998;9(4):692–8.
- 632 16. Wei Q, Wang MH, Dong Z. Differential gender differences in ischemic and nephrotoxic acute renal failure. *Am. J.*  
633 *Nephrol.* 2005;25(5):491–499.

- 634 17. Müller V et al. Sexual dimorphism in renal ischemia-reperfusion injury in rats: Possible role of endothelin . *Kidney*  
635 *Int.* 2002;62(4):1364–1371.
- 636 18. Park KM, Kim JI, Ahn Y, Bonventre AJ, Bonventre J V. Testosterone is responsible for enhanced susceptibility of  
637 males to ischemic renal injury. *J. Biol. Chem.* 2004;279(50):52282–52292.
- 638 19. Wickham Jea, Hanley Hg, Joeke am. Regional renal hypothermia. *Br. J. Urol.* 1967;39(6):727–743.
- 639 20. Stueber P, Kovacs S, Koletsky S, Persky L. Regional hypothermia in acute renal ischemia. *J. Urol.*  
640 1958;79(5):793–800.
- 641 21. Rosen S, Stillman IE. Acute tubular necrosis is a syndrome of physiologic and pathologic dissociation . *J. Am.*  
642 *Soc. Nephrol.* 2008;19(5):871–875.
- 643 22. Heyman SN, Rosenberger C, Rosen S. Experimental ischemia-reperfusion: Biases and mythsthe proximal vs.  
644 distal hypoxic tubular injury debate revisited. *Kidney Int.* 2010;77(1):9–16.
- 645 23. Heyman SN, Rosenberger C, Rosen S. Acute kidney injury: Lessons from experimental models . *Contrib.*  
646 *Nephrol.* 2011;169:286–296.
- 647 24. Khalid U et al. Kidney ischaemia reperfusion injury in the rat: the EGTI scoring system as a valid and reliable tool  
648 for histological assessment. *J. Histol. Histopathol.* 2016;3(1):1.
- 649 25. Kanagasundaram NS. Pathophysiology of ischaemic acute kidney injury . *Ann. Clin. Biochem.* 2015;52(2):193–  
650 205.
- 651 26. Gardner DS et al. Remote effects of acute kidney injury in a porcine model . *Am J Physiol Ren. Physiol*  
652 2016;310:259–271.
- 653 27. T H et al. Factors affecting progression in advanced chronic renal failure. *Clin. Nephrol.* 1993;39(6):312–320.
- 654 28. Hauet T et al. Contribution of large pig for renal ischemia-reperfusion and transplantation studies: The preclinical  
655 model. *J. Biomed. Biotechnol.* 2011;2011:532127.
- 656 29. Schook LB et al. Swine Genome Sequencing Consortium (SGSC): A strategic roadmap for sequencing the pig  
657 genome . In: *Comparative and Functional Genomics.* 2005:251–255
- 658 30. Hannon JP, Bossone CA, Wade CE. Normal physiological values for conscious pigs used in biomedical research.  
659 *Lab. Anim. Sci.* 1990;40(3):293–298.
- 660 31. Capone I, Marchetti P, Ascierio PA, Malorni W, Gabriele L. Sexual Dimorphism Of Immune Responses: A New  
661 Perspective in Cancer Immunotherapy. *Front Immunol.* 2018; 9:552
- 662 32. Stambergova H, Skarydova L, Dunford JE, Wsol V. Biochemical properties of human dehydrogenase/reductase  
663 (SDR family) member 7. *Chem. Biol. Interact.* 2014;207(1):52–57.
- 664 33. Beaudoin JJ, Brouwer KLR, Malinen MM. Novel insights into the organic solute transporter alpha/beta, OST $\alpha/\beta$ :  
665 From the bench to the bedside. *Pharmacol. Ther.* 2020;211:107542.
- 666 34. Vorup-Jensen T, Jensenius JC, Thiel S. MASP-2, the C3 convertase generating protease of the MBLectin  
667 complement activating pathway . *Immunobiology* 1998;199(2):348–357.
- 668 35. Colvin RA, Campanella GSV, Sun J, Luster AD. Intracellular domains of CXCR3 that mediate CXCL9, CXCL10,  
669 and CXCL11 function . *J. Biol. Chem.* 2004;279(29):30219–30227.
- 670 36. Hoerning A et al. Peripherally Circulating CD4 +FOXP3 +CXCR3 + T Regulatory Cells Correlate with Renal  
671 Allograft Function . *Scand. J. Immunol.* 2012;76(3):320–328.
- 672 37. Naeem AA, Abdulsamad SA, Rudland PS, Malki MI, Ke Y. Fatty acid-binding protein 5 (FABP5)-related signal  
673 transduction pathway in castration-resistant prostate cancer cells: a potential therapeutic target . *Precis. Clin. Med.*  
674 2019;2(3):192–196.

- 675 38. Asirvatham AJ, Schmidt M, Gao B, Chaudhary J. Androgens regulate the immune/inflammatory response and  
676 cell survival pathways in rat ventral prostate epithelial cells . *Endocrinology* 2006;147(1):257–271.
- 677 39. Francisco LM, Sage PT, Sharpe AH. The PD-1 pathway in tolerance and autoimmunity . *Immunol. Rev.*  
678 2010;236(1):219–242.
- 679 40. Riella L V., Paterson AM, Sharpe AH, Chandraker A. Role of the PD-1 pathway in the immune response . *Am. J.*  
680 *Transplant.* 2012;12(10):2575–2587.
- 681 41. Priante G, Giancesello L, Ceol M, Del Prete D, Anglani F. Cell death in the kidney. *Int. J. Mol. Sci.*  
682 2019;20(14):3598.
- 683 42. Elmore S. Apoptosis: A Review of Programmed Cell Death . *Toxicol. Pathol.* 2007;35(4):495–516.
- 684 43. Vendola K, Zhou J, Wang J, Bondy CA. Androgens promote insulin-like growth factor-I and insulin-like growth  
685 factor-I receptor gene expression in the primate ovary . *Hum. Reprod.* 1999;14(9):2328–2332.
- 686 44. Nguyen T V., Jayaraman A, Quaglino A, Pike CJ. Androgens selectively protect against apoptosis in  
687 hippocampal neurones . *J. Neuroendocrinol.* 2010;22(9):1013–1022.
- 688 45. Lin Y et al. Androgen and Its Receptor Promote Bax-Mediated Apoptosis . *Mol. Cell. Biol.* 2006;26(5):1908–1916.
- 689 46. Land WG. The role of damage-associated molecular patterns (DAMPs) in human diseases part II: DAMPs as  
690 diagnostics, prognostics and therapeutics in clinical medicine . *Sultan Qaboos Univ. Med. J.* 2015;15(2):e157–e170.
- 691 47. Yang J, Liu Y. Dissection of key events in tubular epithelial to myofibroblast transition and its implications in renal  
692 interstitial fibrosis . *Am. J. Pathol.* 2001;159(4):1465–1475.
- 693 48. Terada Y et al. Expression and Function of the Developmental Gene Wnt-4 during Experimental Acute Renal  
694 Failure in Rats *J Am Soc Nephrol.* 2003 May;14(5):1223-1233.
- 695 49. Edgar R, Domrachev M, Lash AE. Gene Expression Omnibus: NCBI gene expression and hybridization array  
696 data repository . *Nucleic Acids Res.* 2002;30(1):207–210.
- 697 50. Barrett T et al. NCBI GEO: Archive for functional genomics data sets - Update . *Nucleic Acids Res.*  
698 2013;41(D1):D991–D995.
- 699 51. Irizarry RA et al. Exploration, normalization, and summaries of high density oligonucleotide array probe level  
700 data.. *Biostatistics* 2003;4(2):249–264.
- 701 52. Smyth GK. Linear models and empirical bayes methods for assessing differential expression in microarray  
702 experiments. *Stat. Appl. Genet. Mol. Biol.* 2004;3(1).
- 703 53. Benjamini Y, Hochberg Y. Benjamini-1995.pdf . *J. R. Stat. Soc. B* 1995;57(1):289–300.
- 704 54. Reimand J et al. Pathway enrichment analysis and visualization of omics data using g:Profiler, GSEA, Cytoscape  
705 and EnrichmentMap . *Nat. Protoc.* 2019;14(2):482–517.
- 706 55. Shannon P et al. Cytoscape: A software Environment for integrated models of biomolecular interaction networks.  
707 *Genome Res.* 2003;13(11):2498–2504.
- 708 56. Merico D, Isserlin R, Stueker O, Emili A, Bader GD. Enrichment map: A network-based method for gene-set  
709 enrichment visualization and interpretation. *PLoS One* 2010;5(11).
- 710 57. Morris JH et al. ClusterMaker: A multi-algorithm clustering plugin for Cytoscape. *BMC Bioinformatics* 2011;12.
- 711 58. Oesper L, Merico D, Isserlin R, Bader GD. WordCloud: A Cytoscape plugin to create a visual semantic summary  
712 of networks. *Source Code Biol. Med.* 2011;6.
- 713 59. Assenov Y, Ramírez F, Schelhorn S-E, Lengauer T, Albrecht M. Computing topological parameters of biological  
714 networks . *Bioinforma. Appl.* 2008;24(2):282–284.
- 715 60. Kucera M, Isserlin R, Arkhangorodsky A, Bader GD. AutoAnnotate: A Cytoscape app for summarizing networks

716 with semantic annotations. *F1000Res*. 2016 Jul 15;5:1717.  
717 61. Babicki S et al. Heatmapper: web-enabled heat mapping for all . *Nucleic Acids Res*. 2016;44:147–153.  
718  
719  
720  
721  
722  
723  
724  
725

726 **FIGURE LEGENDS**

727

728 **Figure 1. Assessment of biochemical parameters and histological examination following porcine**  
729 **renal ischemia/reperfusion injury.**

730 A) Experimental design of renal unilateral IRI following contralateral nephrectomy. Ischemia was induced  
731 for 30 minutes. Data were collected before injury, 5 minutes and 7 days following renal clamping. B)  
732 Measurement of blood urea nitrogen (BUN) and serum creatinine (SCr) levels in males (blue) and females  
733 (red). The “y” axis represents blood urea nitrogen and serum creatinine concentration, respectively, and the  
734 “x” axis represents the time points. Average values  $\pm$  SEM are plotted in the graph (N=5). C) Representative  
735 images of different levels of tubular injury and interstitial infiltration in pig kidney. Arrows indicate specifically  
736 damaged cells. Magnification = 20X, scale bar = 100  $\mu$ m. D) Quantification of tubular injury (upper panel)  
737 and interstitial infiltration (lower panel) scored by an expert pathologist was classified by group and sex  
738 (males in blue, females in red). The y-axis represents the % of animals showing each level of injury or  
739 infiltration, respectively. Abbreviations: BUN: blood urea nitrogen PR: pre-ischemia; PS: post-ischemia; WL:  
740 one week later. \* $p < 0.05$ .

741

742 **Figure 2. Hierarchical clustering of microarray assays based of kidney porcine throughout renal IRI**  
743 **in a time and sex manner.**

744 Gene expression for males and females were compared at different time points (PR, PS, and WL). A)  
745 Heatmaps graphically illustrating the differences in the gene expression levels for the time comparison in  
746 males (left) and females (right). Similar pattern of expression was observed for both sexes. B) Heatmap  
747 representing the difference in expression by comparing males and females at the same time point (sex  
748 comparison). The green color represent genes with lower expression and the red color represent the ones  
749 with higher expression. Genes represented in the heatmaps have an adj.P. value  $\leq 0.25$  and  $|\log FC| \geq 1$ .  
750 Abbreviations: F: female; M: male; PR: pre-ischemia; PS: post-ischemia; WL: one week later.

751

752

753 **Figure 3. Validation of porcine renal IRI microarray assays by qRT-PCR experiments followed by**  
754 **evaluation of mRNA levels of selected targets in human ischemic kidney biopsies**

755 A) Expression values of five selected targets from microarray assays displaying time and sex differences.  
756 B) Relative mRNA levels of *FABP5*, *IFIT3*, *RSAD2*, *CXCL10*, *CD274* were measured and compared by qRT-  
757 PCR. For the time comparison, the different time points (PR, PS, WL) were compared with each other for  
758 each sex (blue male, red female). For the sex comparison, a selected time point in male was compared to  
759 the equivalent time point in female. Blue and red lines represent a time comparison in male or female,  
760 respectively. Black lines represent sex comparison at equivalent time points. C) *RSAD2*, *CXCL10*, *CD274*,  
761 *FABP5* and *IFIT3* expression levels were evaluated by qPCR in post-surgery (PS) conditions from samples  
762 of 36-80 and 53-83 years old men and women, respectively (N>7). \*: P-value  $\leq 0.05$ ; \*\*: P-value  $\leq 0.01$ ; \*\*\*:

763 P-value  $\leq 0.001$ ; \*\*\*\*: P-value  $\leq 0.0001$ , ns: not significant. Abbreviations: F: female; M: male; PR: pre-  
764 ischemia; PS: post-ischemia; WL: one week later.

765

766 **Figure 4. Venn diagrams of time and sex comparisons between males and females throughout renal**  
767 **IRI.** Venn diagrams depicting the number of commonly regulated genes A) in male and B) in females at  
768 different time point comparisons: PS vs. PR, WL vs. PS and WL vs. PR. Males showed an overall higher  
769 number of regulated genes. C) Venn diagrams depicting the number of commonly regulated genes in the  
770 sex comparison at different time points: PR, PS and WL. Only two genes were commonly regulated one  
771 week following injury. Genes represented only in italic are down-regulated, whereas genes in bold and italic  
772 are up-regulated. Genes underlined are both up- and down-regulated in respective comparisons. Complete  
773 gene tables are available in supplemental material. adj. p-value  $\leq 0.25$  and  $\log |FC| \geq 1$ . Abbreviations: F:  
774 female; M: male; PR: pre-ischemia; PS: post-ischemia; WL: one week later.

775

776 **Figure 5. IPA heatmap gene expression representation of top regulated genes.** Microarray data files  
777 of pig experiments were uploaded in IPA software. Results were reported in hierarchical clustering of top up  
778 and down regulated genes in A) a sex- (MPR vs. FPR) and B) time- (MPR vs. MWL) comparisons. Data  
779 from a castrated male was compared with male and female pig expression patterns. The castrated male  
780 showed a gene expression pattern similar to females. Abbreviations: F: female; M: male; CM: castrated  
781 male; PR: pre-ischemia; WL: one week later.

782

783 **Figure 6. Enrichment map example of over-represented genes in individual sex comparisons M.WL**  
784 **vs. F.WL following GSEA analyses.**

785 A) Representation of different clusters (nodes) regulated in the comparison. The map allows visualization of  
786 clusters containing nodes in which red and blue represent up- or down-regulated gene sets for each node,  
787 respectively. The clusters take their name from the most common containing names of the nodes within the  
788 cluster. B) Example of the different gene sets that form somatic recombination immune and acid steroids  
789 fatty nodes, where red and blue nodes represent up- or down-regulated gene sets, respectively. (FDR: 0.01-  
790 0.1).

791

792 **Figure 7. Patterns of gene sets regulation in male and female kidneys throughout renal IRI in the**  
793 **time comparison.**

794 An example of the gene sets of selected clusters represented by hierarchical clustering. A) Heatmap (of  
795 time comparisons) was created with the normalized enrichment score (NES) values of the gene sets  
796 calculated by GSEA analysis. The red and blue colors refer to gene sets that are over- or under-represented  
797 in the heat-maps. B) Five prominent patterns for time comparison were determined. C) A summary of these  
798 five temporal patterns is depicted in a diagram, where patterns displayed in each sex are illustrated by a

799 colored arrow positioned at the time point where they are up-regulated (PR, PS, WL). Abbreviations: PR:  
800 pre-ischemia; PS: post-ischemia; WL: one week later.

801

802 **Figure 8. Patterns of gene sets regulation in male and female kidneys throughout renal IRI in the sex**

803 **comparison.** Gene sets of selected clusters were represented by hierarchical clustering. A) Heatmaps (of

804 sex comparisons) were created with the normalized enrichment score (NES) values of the gene sets

805 calculated by GSEA analysis. The red and blue colors refer to gene sets that are over- or under-represented

806 in the heat-maps. B) Four prominent patterns for sex comparison were determined. C) A summary of these

807 four temporal patterns is depicted in a diagram. Abbreviations: PR: pre-ischemia; PS: post-ischemia; WL:

808 one week later).

809

810 **Supplementary figure 1.** Number of genes differentially expressed throughout renal IRI in porcine kidney

811 males and females at different time points (adjusted p-value  $\leq 0.25$  were considered. (PR: pre-ischemia; PS:

812 post-ischemia; WL: one week later).

813

814 **Supplementary figure 2.** Number of genes differentially expressed throughout renal IRI in porcine kidney

815 between males and females at the same time point (adjusted p-value  $\leq 0.25$  were considered. (PR: pre-

816 ischemia; PS: post-ischemia; WL: one week later).

817

818 **Supplementary figure 3. Protocol overview of GSEA analysis.** Gene lists derived from diverse omics

819 data undergo pathway enrichment analysis, using GSEA, to identify pathways that are enriched in the

820 experiment. Pathway enrichment analysis results are visualized and interpreted in Cytoscape using its

821 EnrichmentMap, AutoAnnotate, WordCloud and clusterMaker2 applications.



822 **TABLES LEGENDS**

823

824 **Table 1.** Summary of clusters and gene sets included in the pattern 1 for the renal IRI time comparison.

825

826 **Table 2.** Summary of clusters and gene sets included in the pattern 2 for the renal IRI time comparison.

827

828 **Table 3.** Summary of clusters and gene sets included in the pattern 3 for the renal IRI time comparison.

829

830 **Table 4.** Summary of clusters and gene sets included in the pattern 4 for the renal IRI time comparison.

831

832 **Table 5.** Summary of clusters and gene sets included in the pattern 5 for the renal IRI time comparison.

833

834 **Table 6.** Summary of clusters and gene sets included in the pattern A for the renal IRI sex comparison.

835

836 **Table 7.** Summary of clusters and gene sets included in the pattern B for the renal IRI sex comparison.

837

838 **Table 8.** Summary of clusters and gene sets included in the pattern C for the renal IRI sex comparison.

839

840 **Table 9.** Summary of clusters and gene sets included in the pattern D for the renal IRI sex comparison.

841

842 **Table S1.** Serum creatinine and BUN levels in males and females pigs throughout the experiment

843

844 **Table S2.** Top 10 up- and down-regulated gene sets and NES in GSEA analysis for FPS vs FPR comparison

845

846 **Table S3.** Top 10 up- and down-regulated gene sets and NES in GSEA analysis for FWL vs FPS comparison

847

848 **Table S4.** Top 10 up- and down-regulated gene sets and NES in GSEA analysis for FWL vs FPR

849 comparison

850

851 **Table S5.** Top 10 up- and down-regulated gene sets and NES in GSEA analysis for MPS vs MPR

852 comparison

853

854 **Table.S6.** Top 10 up- and down-regulated gene sets and NES in GSEA analysis for MWL vs MPS

855 comparison

856

857 **Table S7.** Top 10 up- and down-regulated gene sets and NES in GSEA analysis for MWL vs MPR

858 comparison

859

860 **Table S8.** Top 10 up- and down-regulated gene sets and NES in GSEA analysis for MPR vs FPR  
861 comparison

862

863 **Table S9.** Top 10 up- and down-regulated gene sets and NES in GSEA analysis for MPS vs FPS  
864 comparison

865

866 **Table S10.** Top 10 up- and down-regulated gene sets and NES in GSEA analysis for MWL vs FWL  
867 comparison

**Figure 1****A)**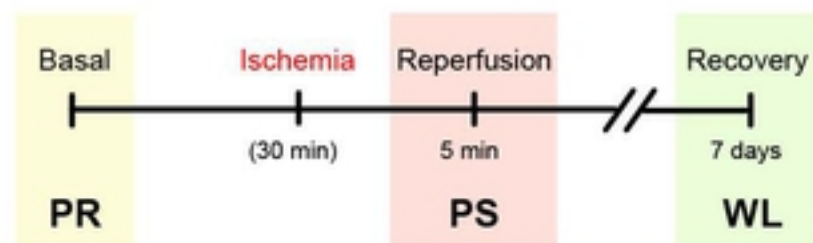**B)**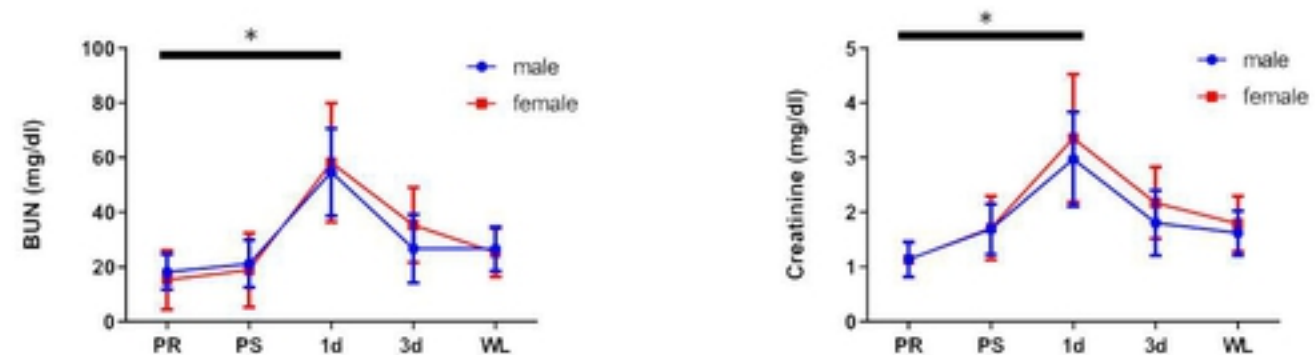**C)**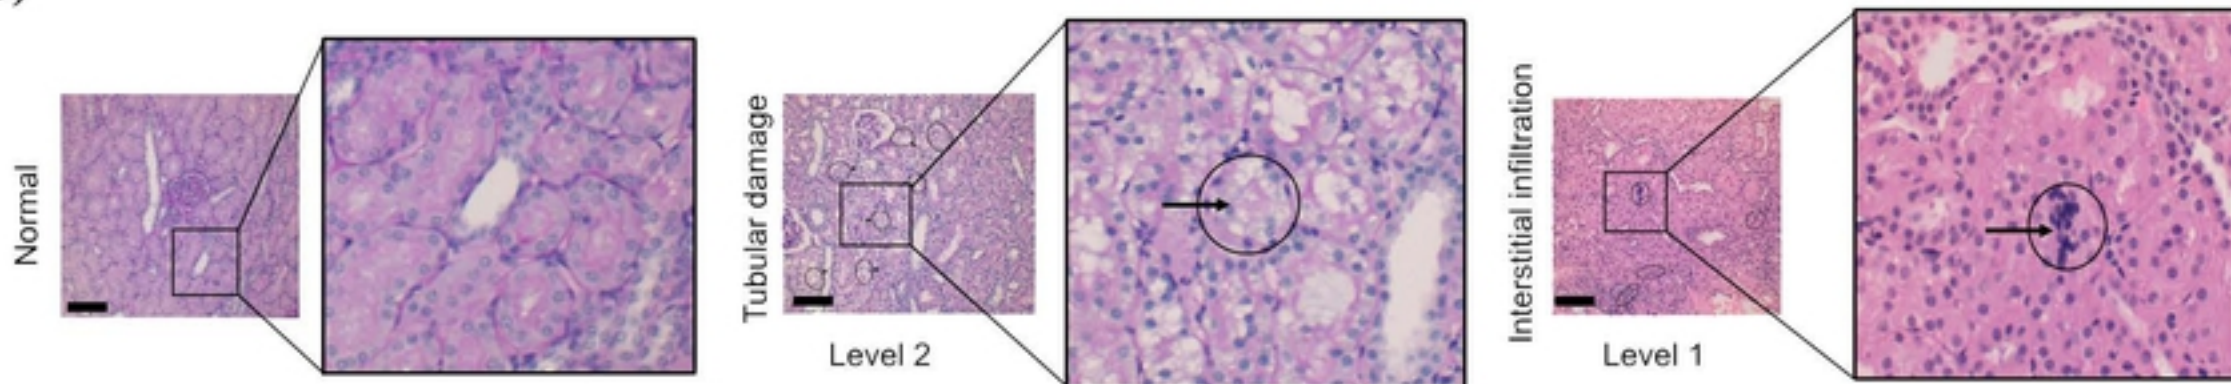**D)**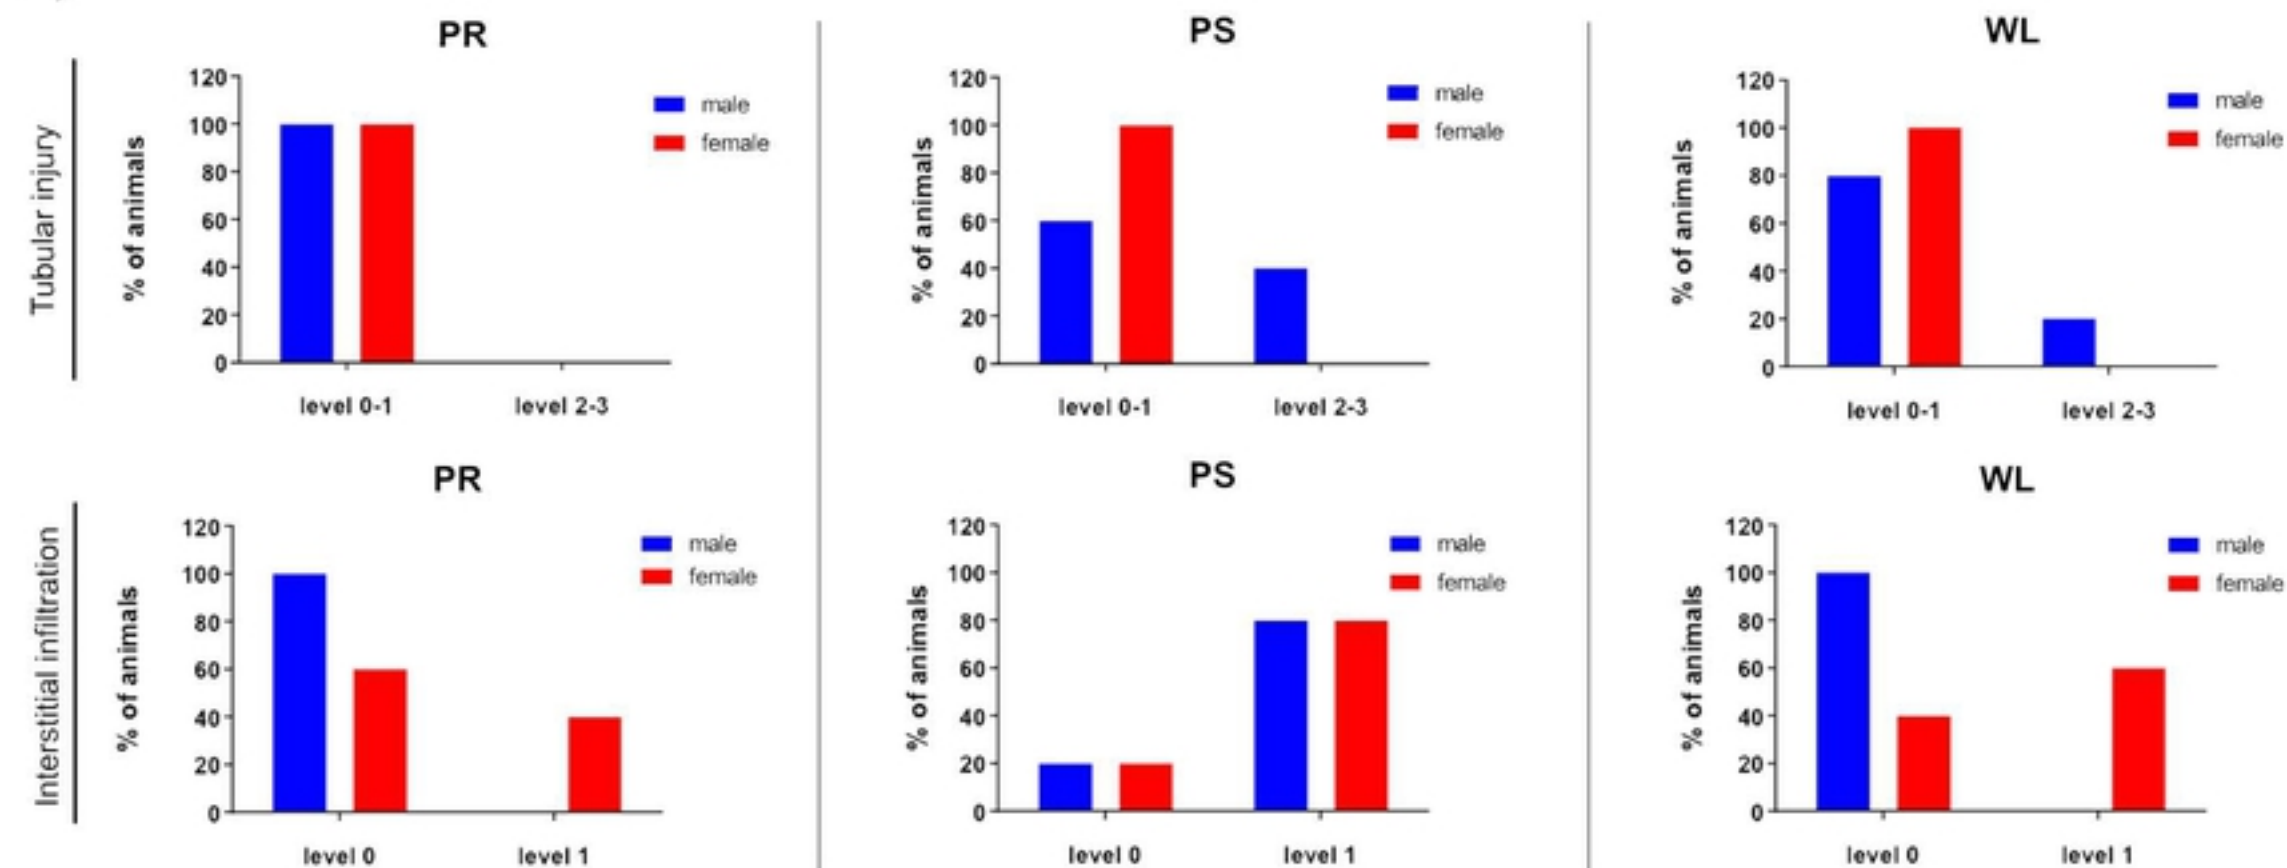

**Figure 2**

**A)**

Time comparison

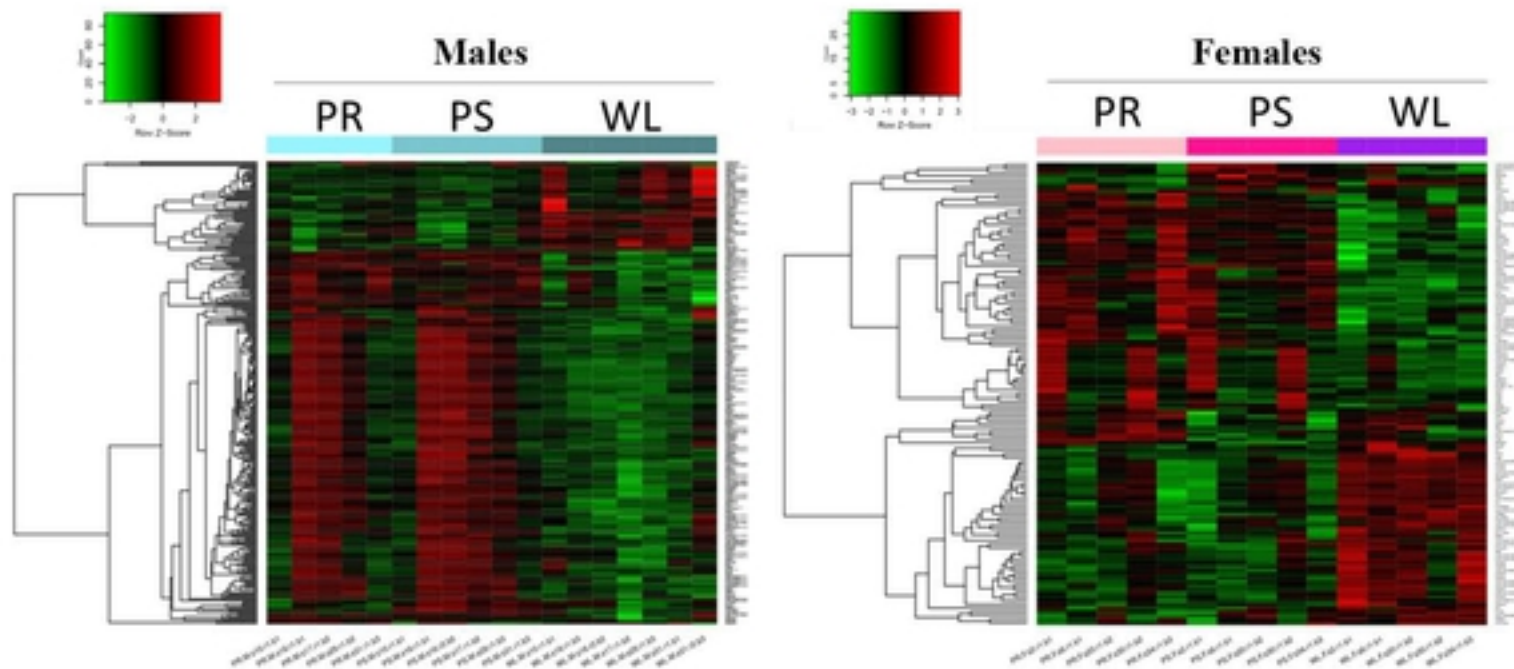

**B)**

Sex comparison

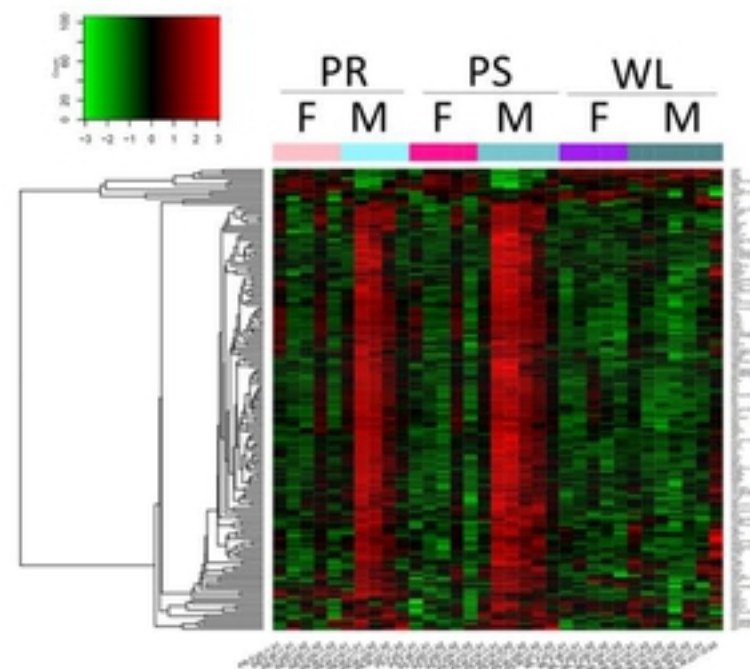

# Figure 3

A)

| Genes             | Males vs Females |       |    | Males    |          | Females  |          |
|-------------------|------------------|-------|----|----------|----------|----------|----------|
|                   | PR               | PS    | WL | WL vs PR | WL vs PS | WL vs PR | WL vs PS |
| <i>IFIT3</i>      | 2,71             | 3,26  | -  | -3,34    | -3,3     | -        | -        |
| <i>FABP5</i>      | -                | -1,01 | -  | 2,1      | 1,94     | 0,94     | 1,14     |
| <i>CXCL10</i>     | 2,59             | 3,11  | -  | -3,87    | -3,84    | -1,91    | -1,51    |
| <i>RSAD2/IRG6</i> | 0,92             | 3,24  | -  | -3,01    | -3,08    | -        | -        |
| <i>CD274</i>      | 2,31             | 2,89  | -  | -2,44    | -2,6     | -        | -        |

B)

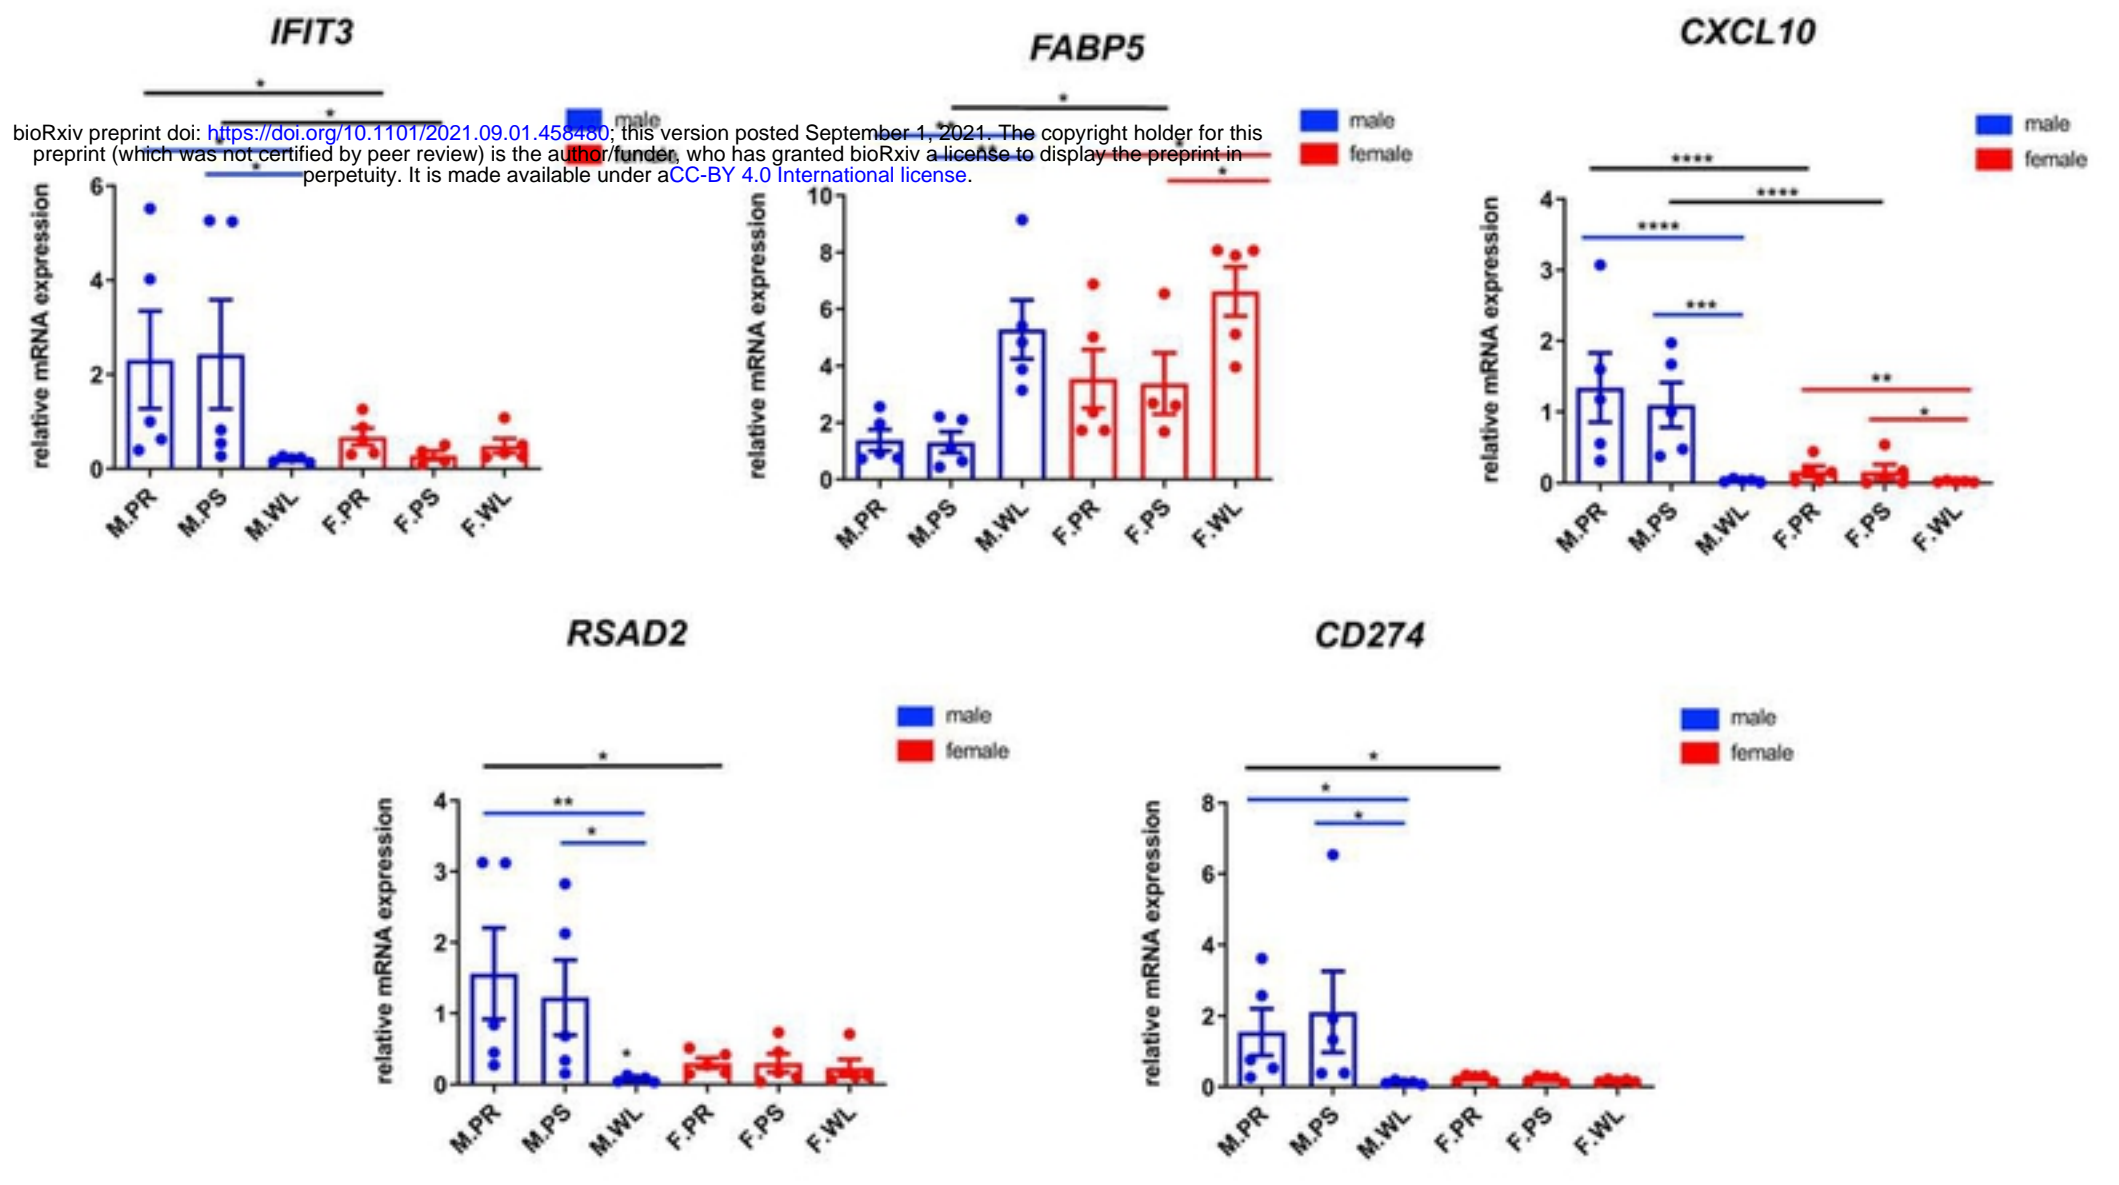

C)

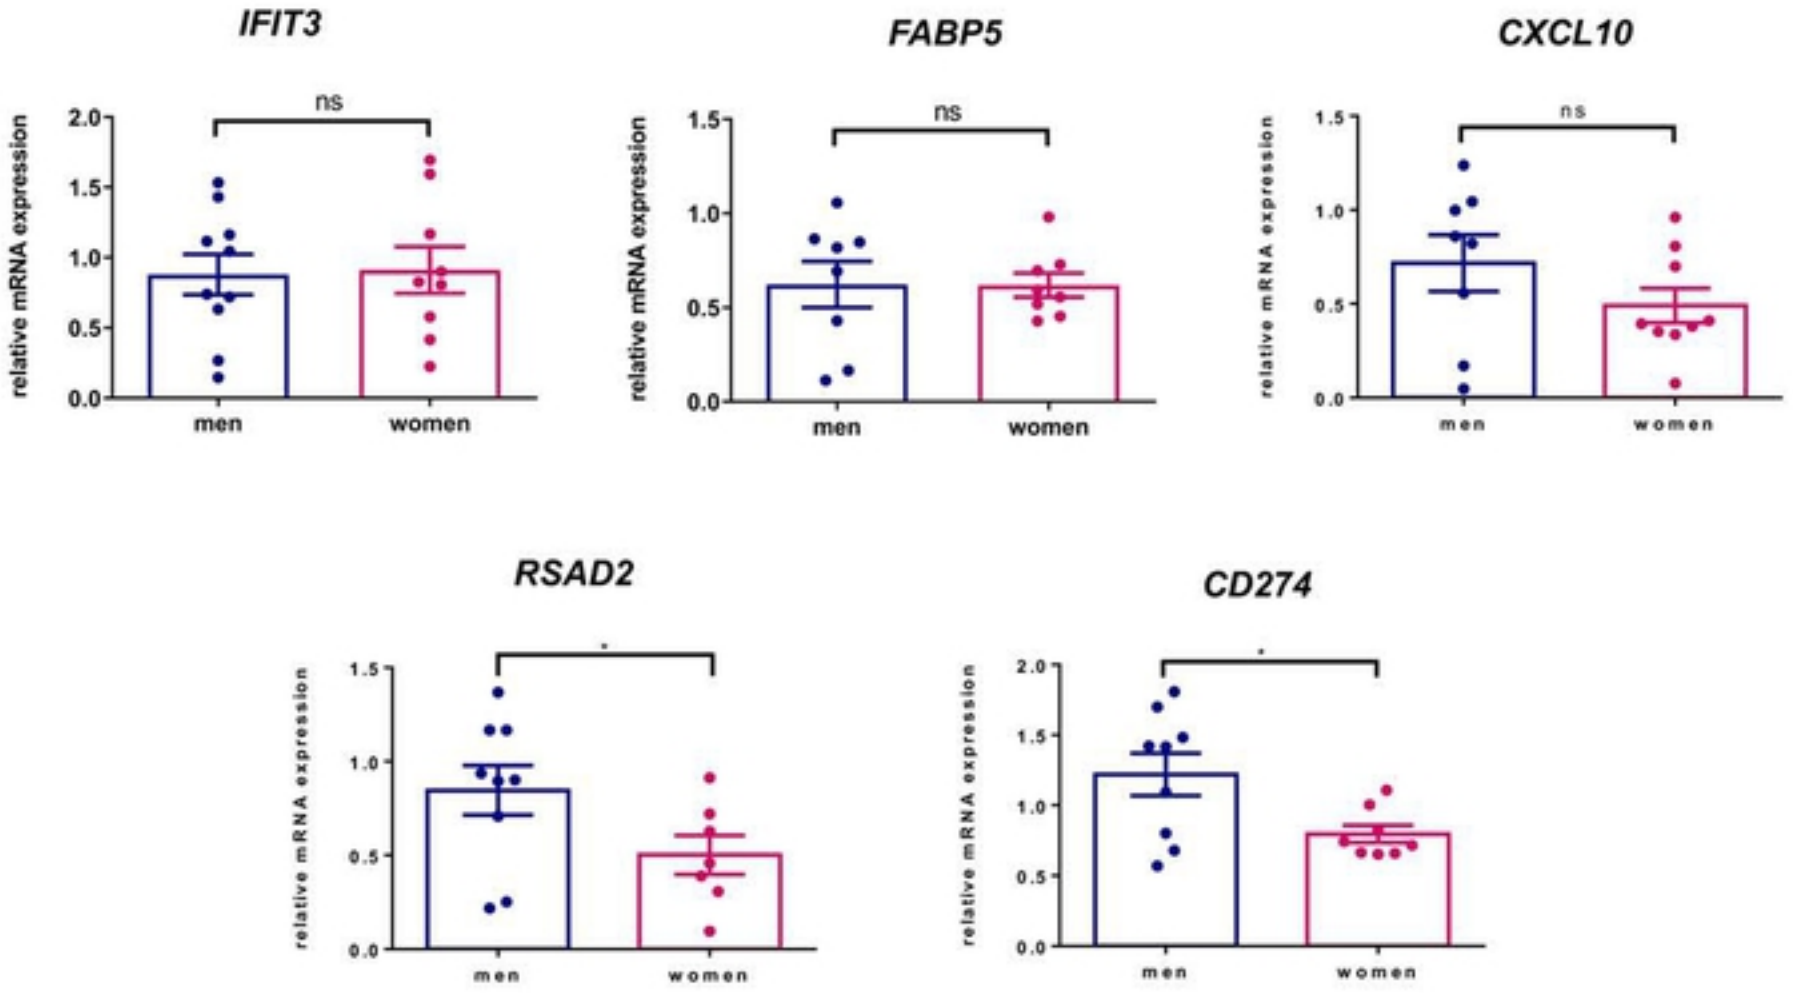

# Figure 4

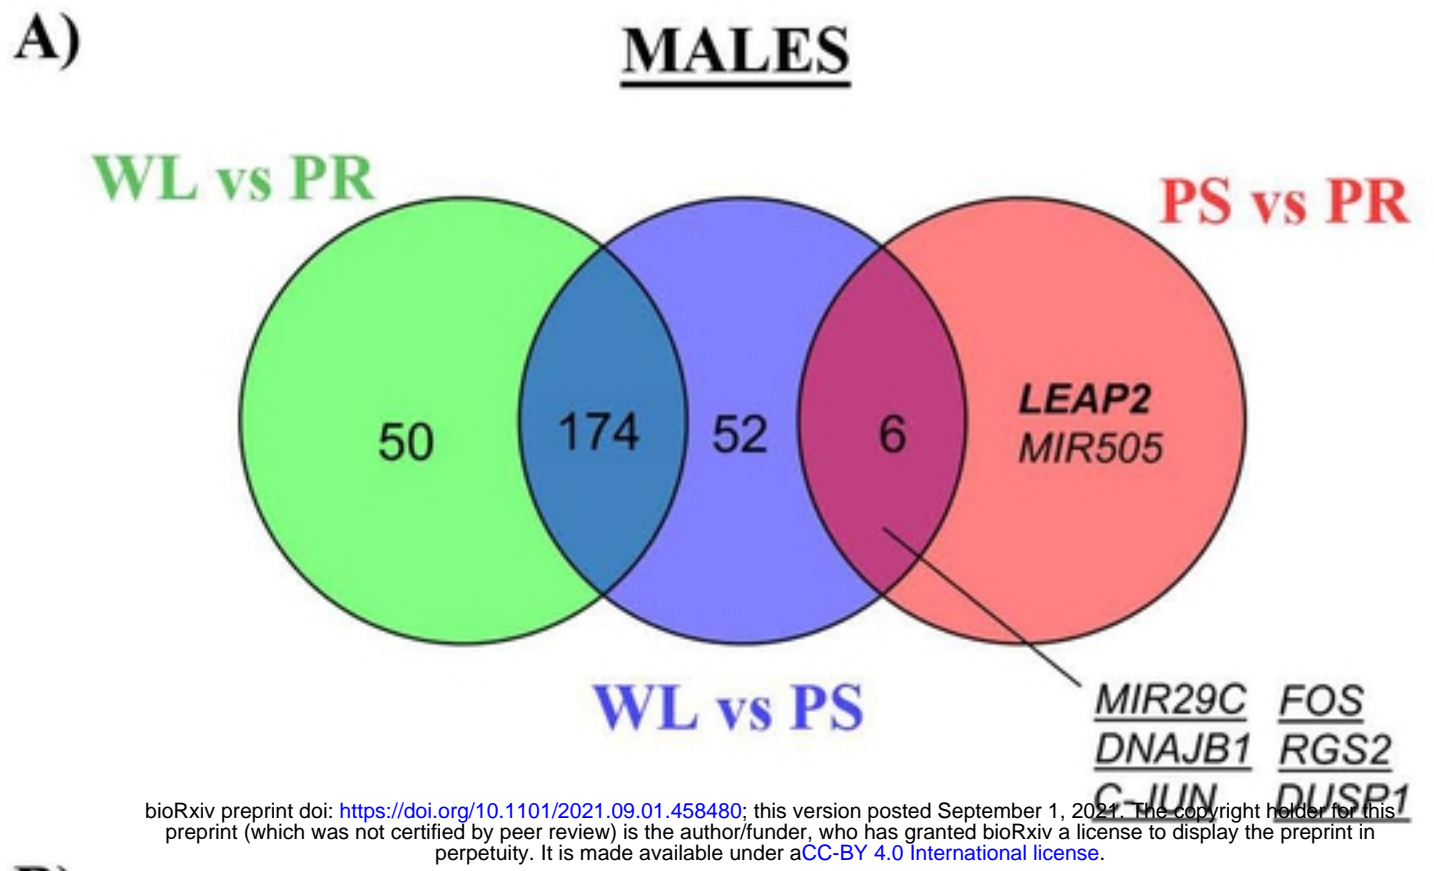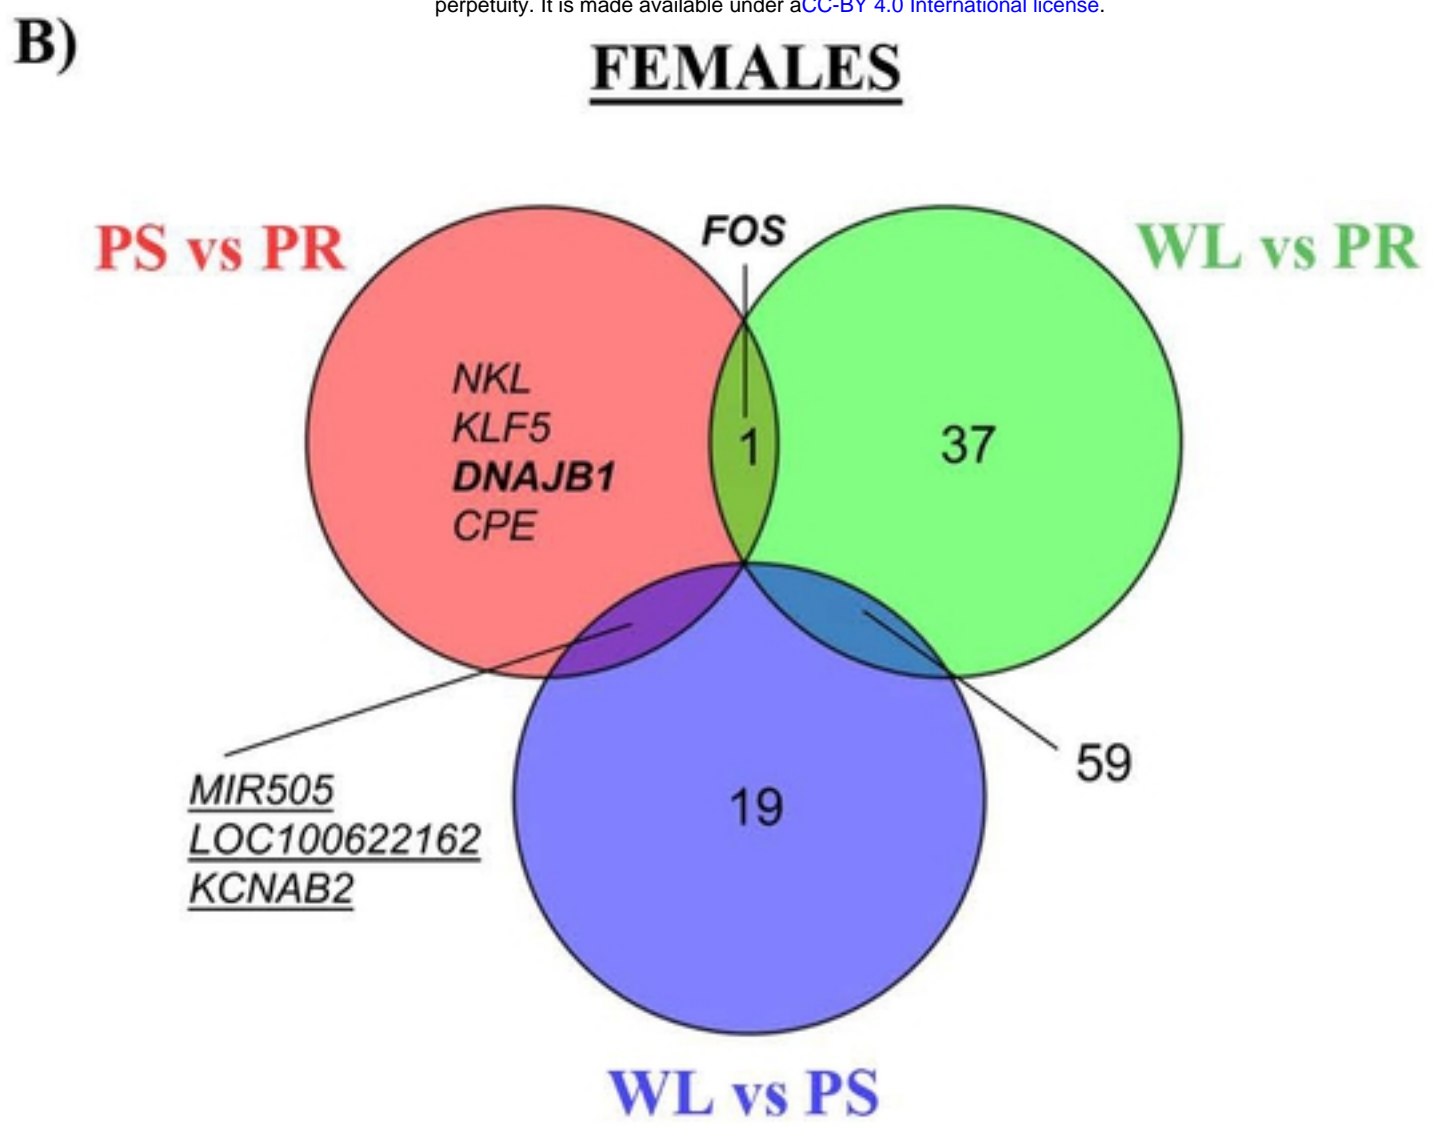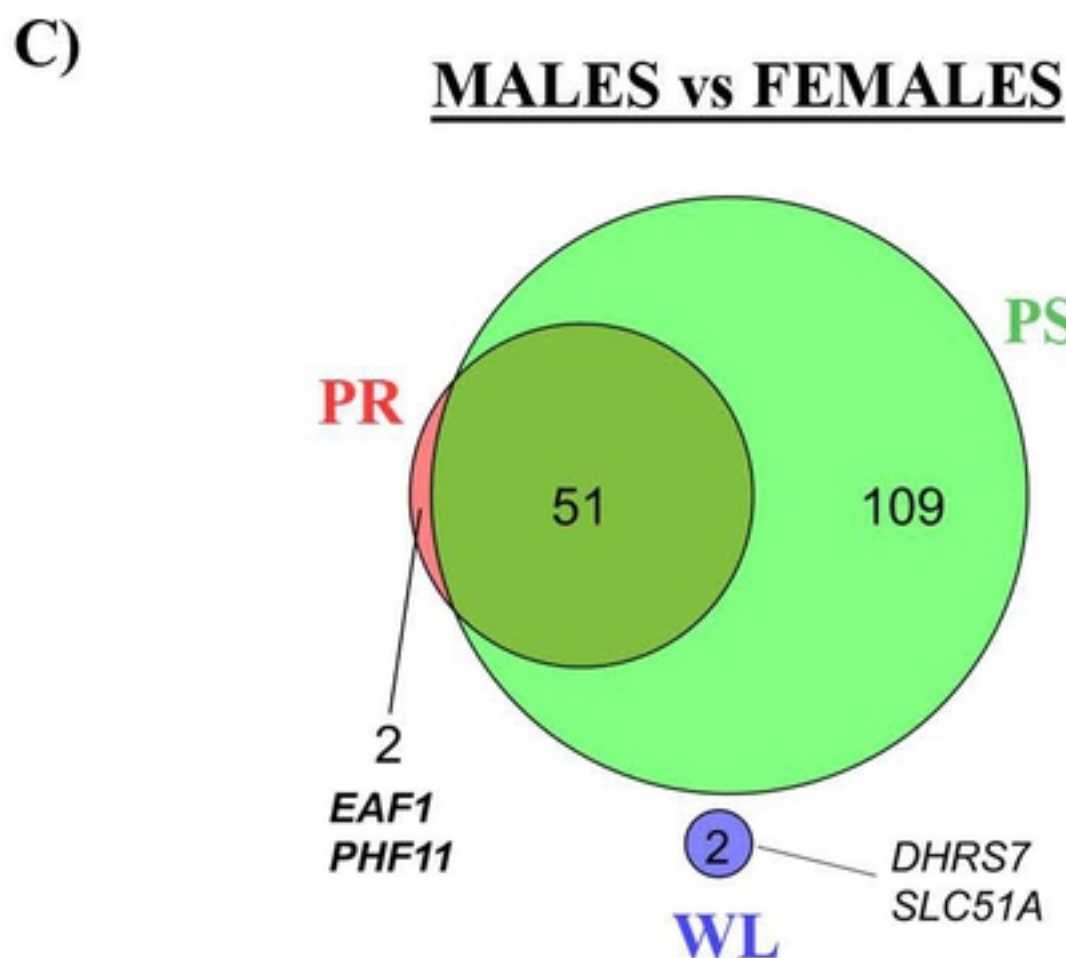

**Figure 5**

**A)**

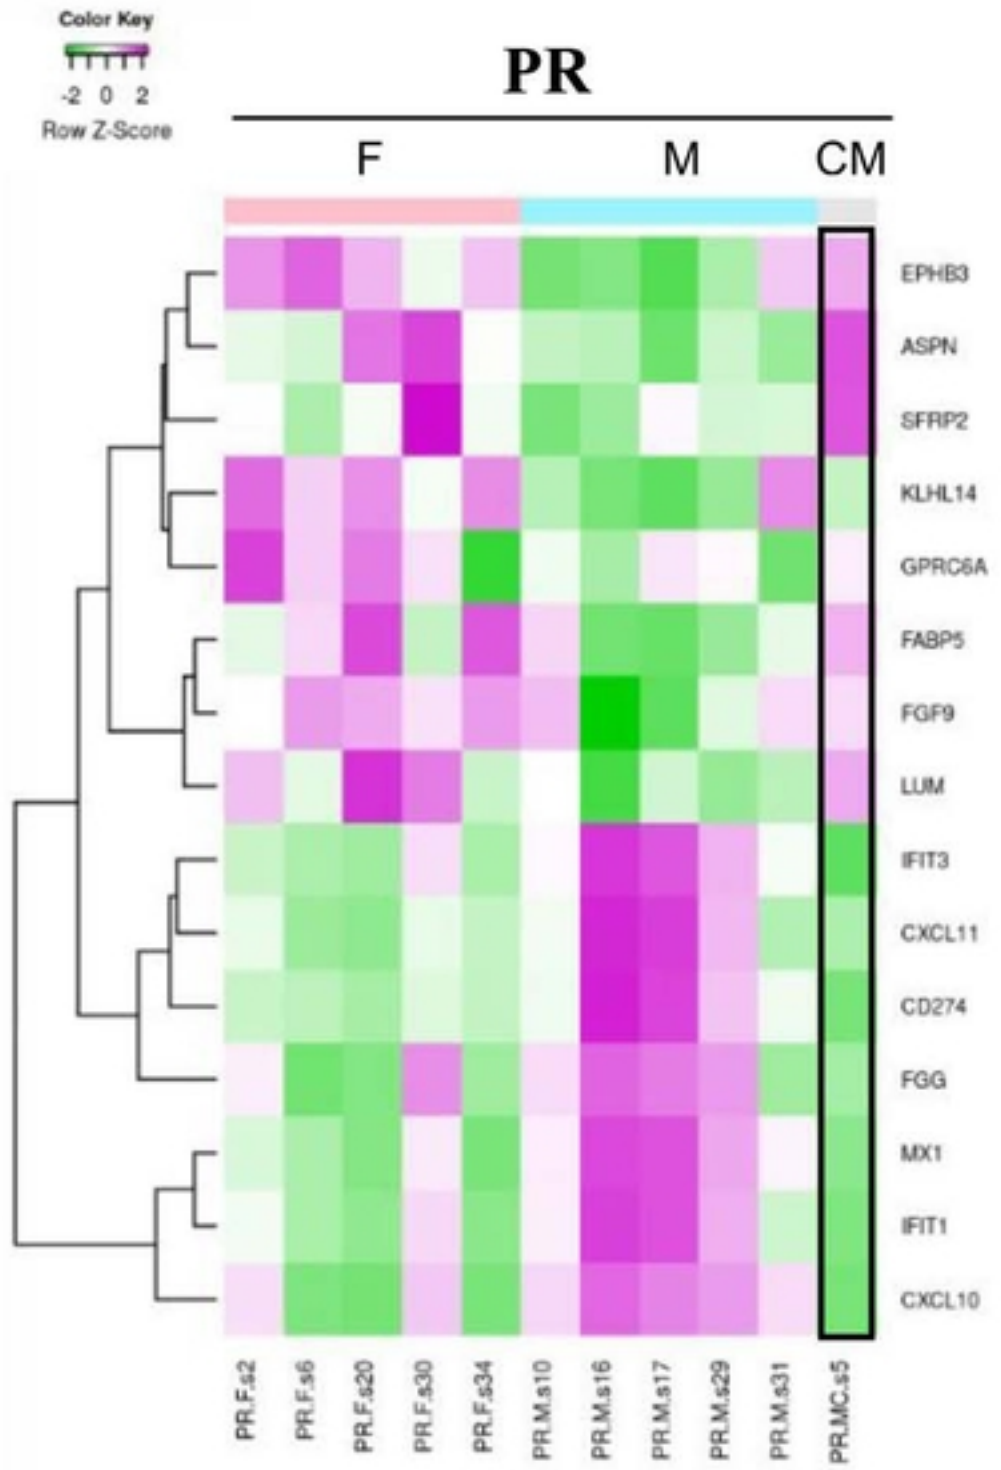

**B)**

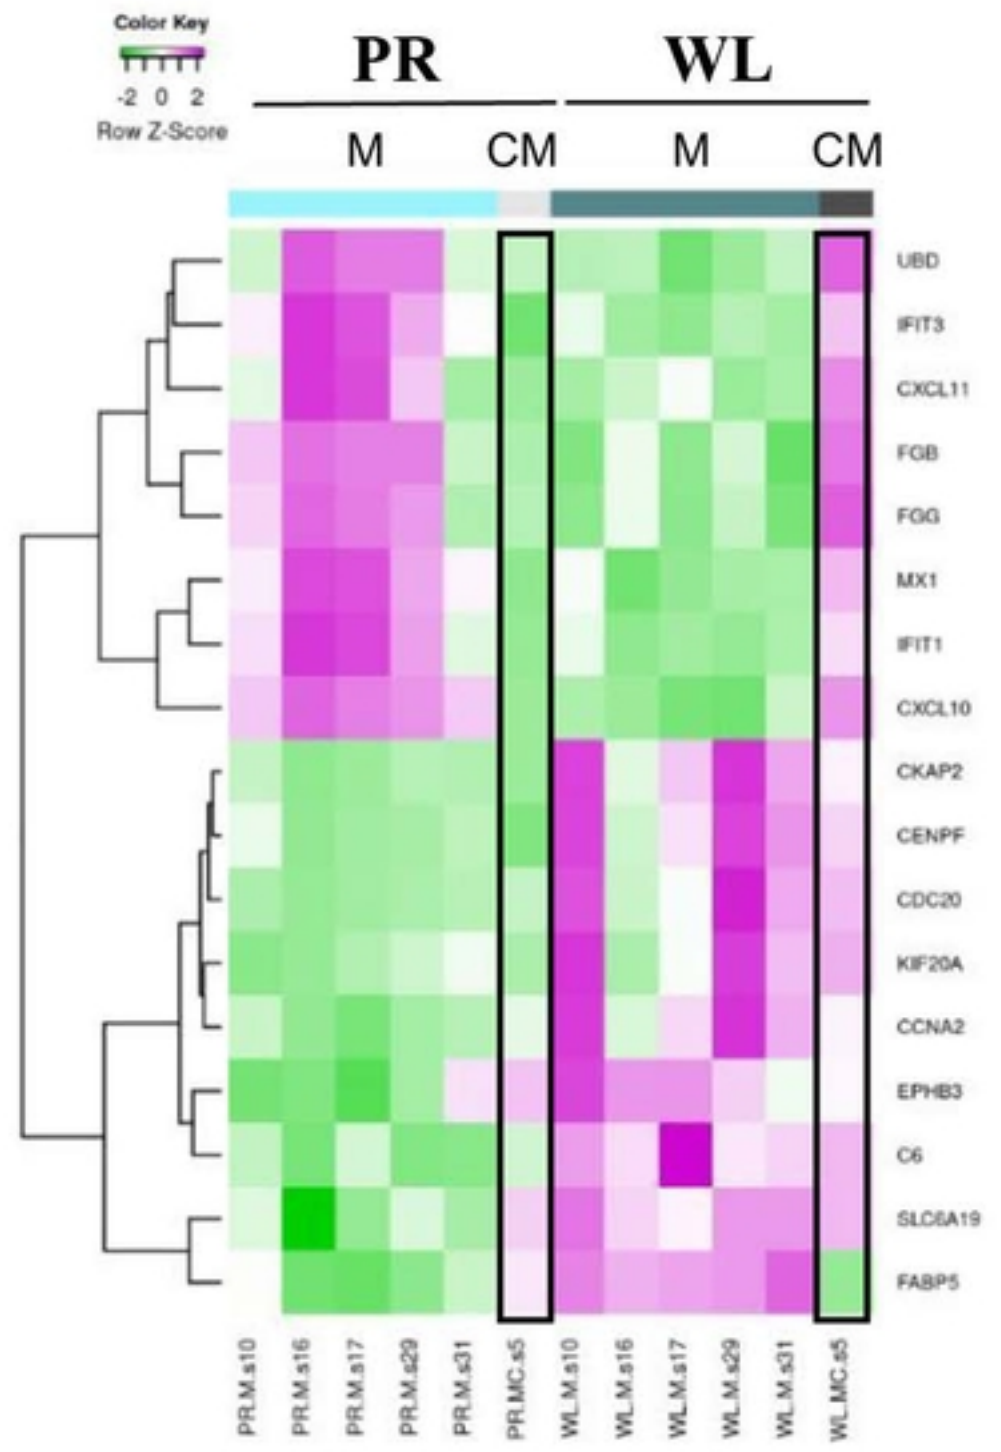

**Figure 6**

**A)**

**Sex comparison: Male WL vs Females WL**

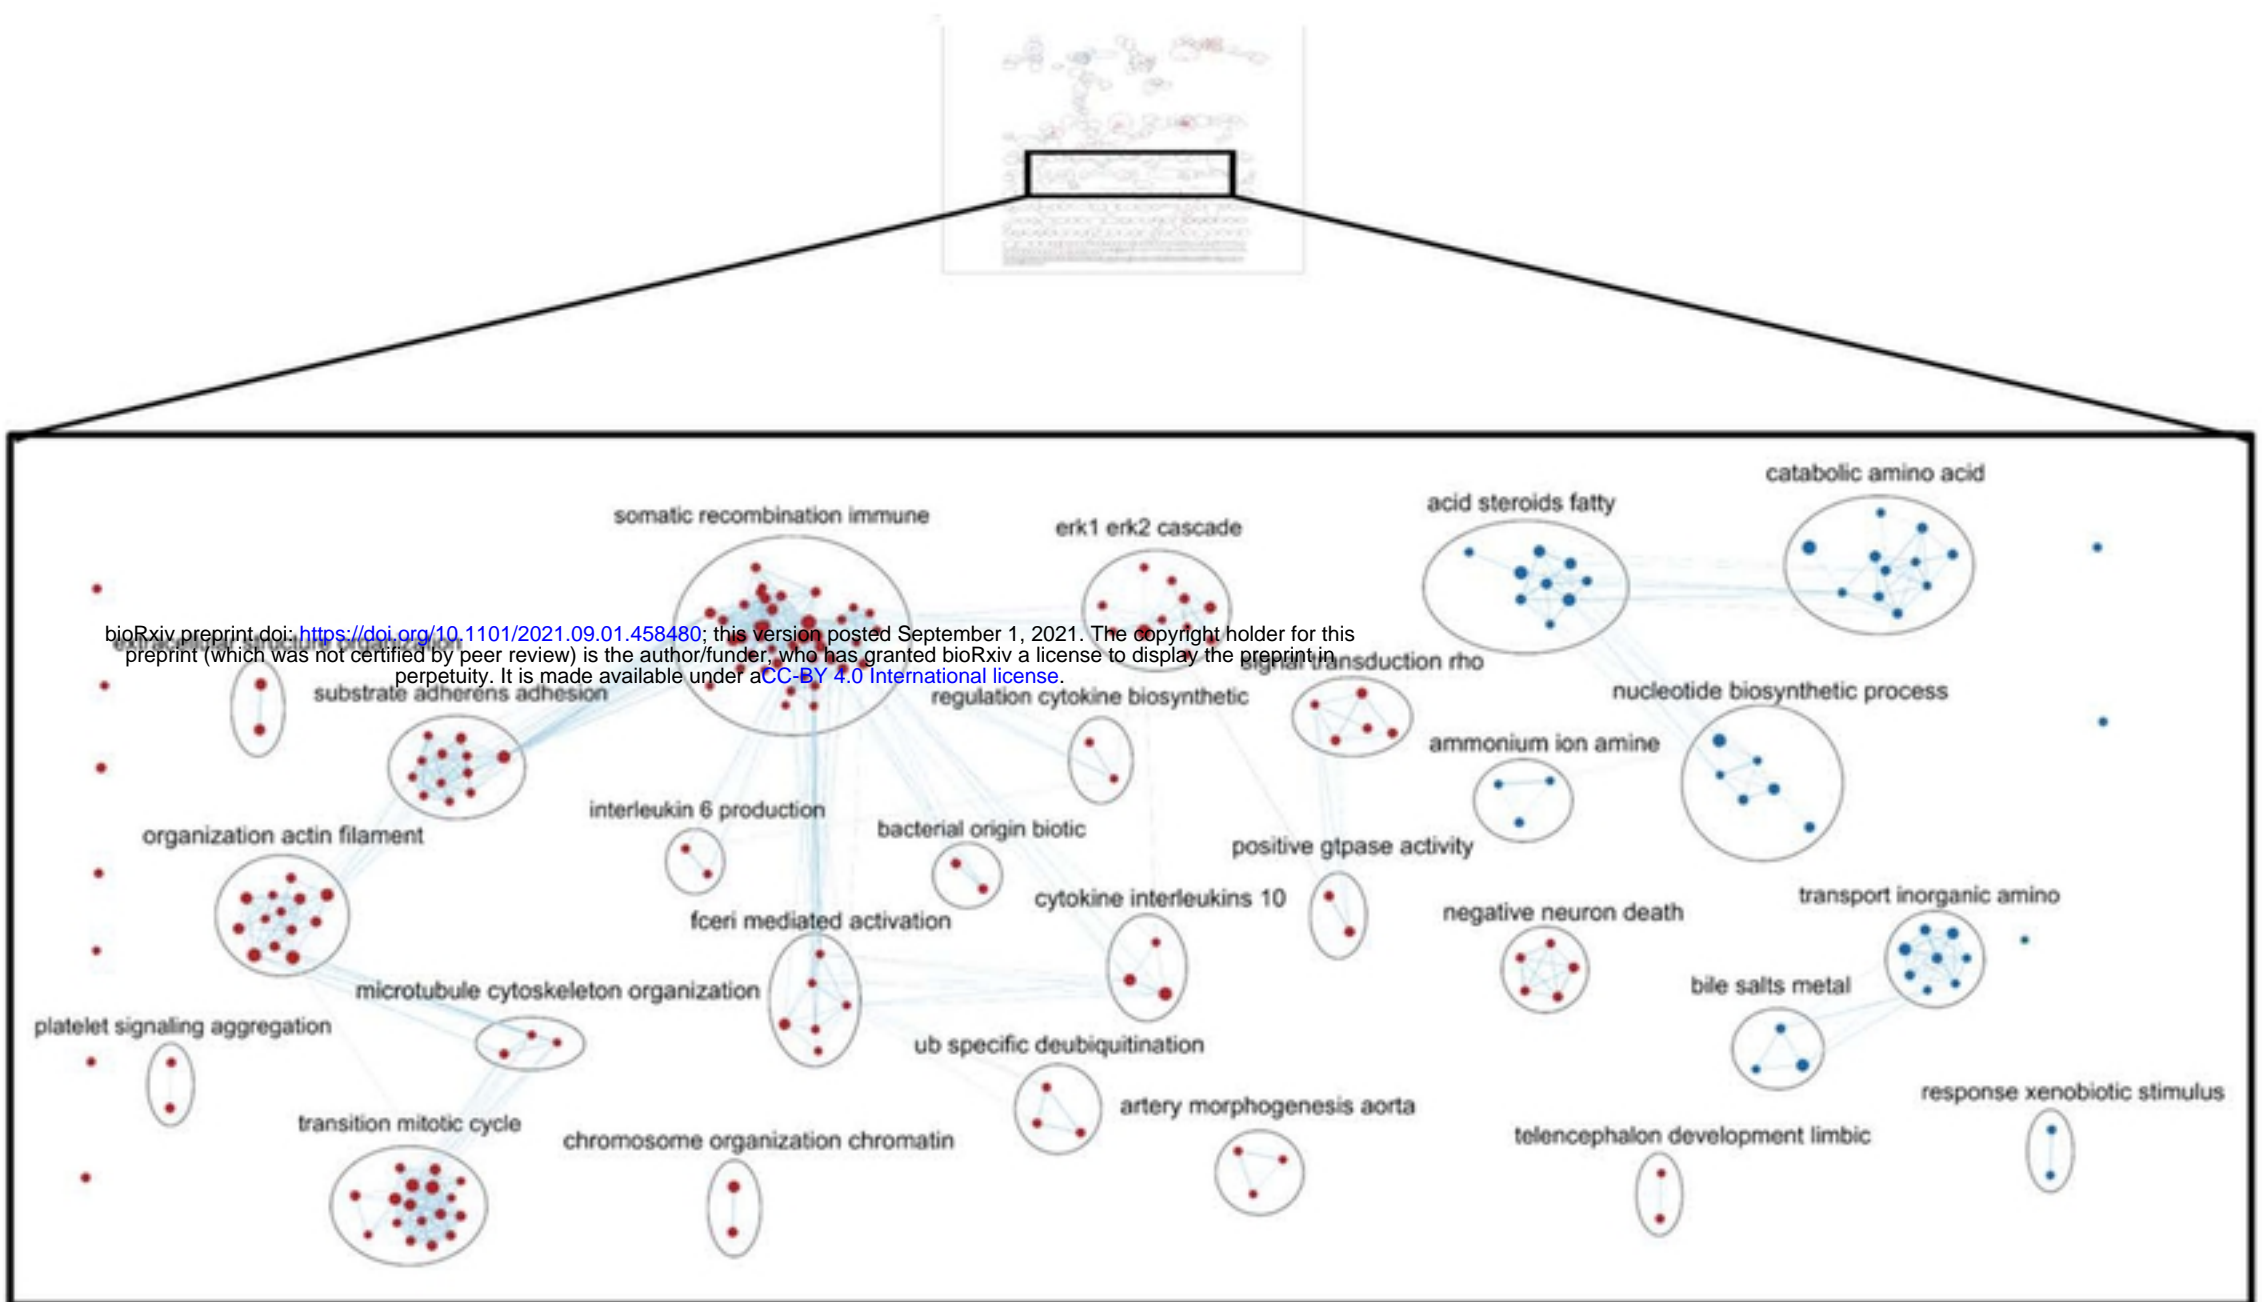

bioRxiv preprint doi: <https://doi.org/10.1101/2021.09.01.458480>; this version posted September 1, 2021. The copyright holder for this preprint (which was not certified by peer review) is the author/funder, who has granted bioRxiv a license to display the preprint in perpetuity. It is made available under aCC-BY 4.0 International license.

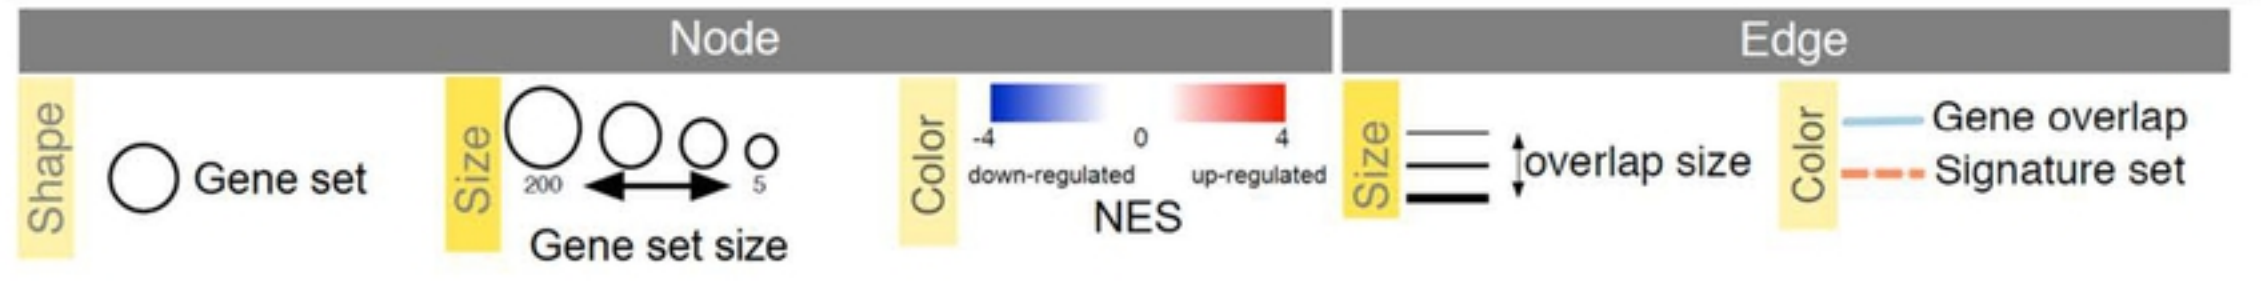

**B)**

**Immune Somatic Recombination node**

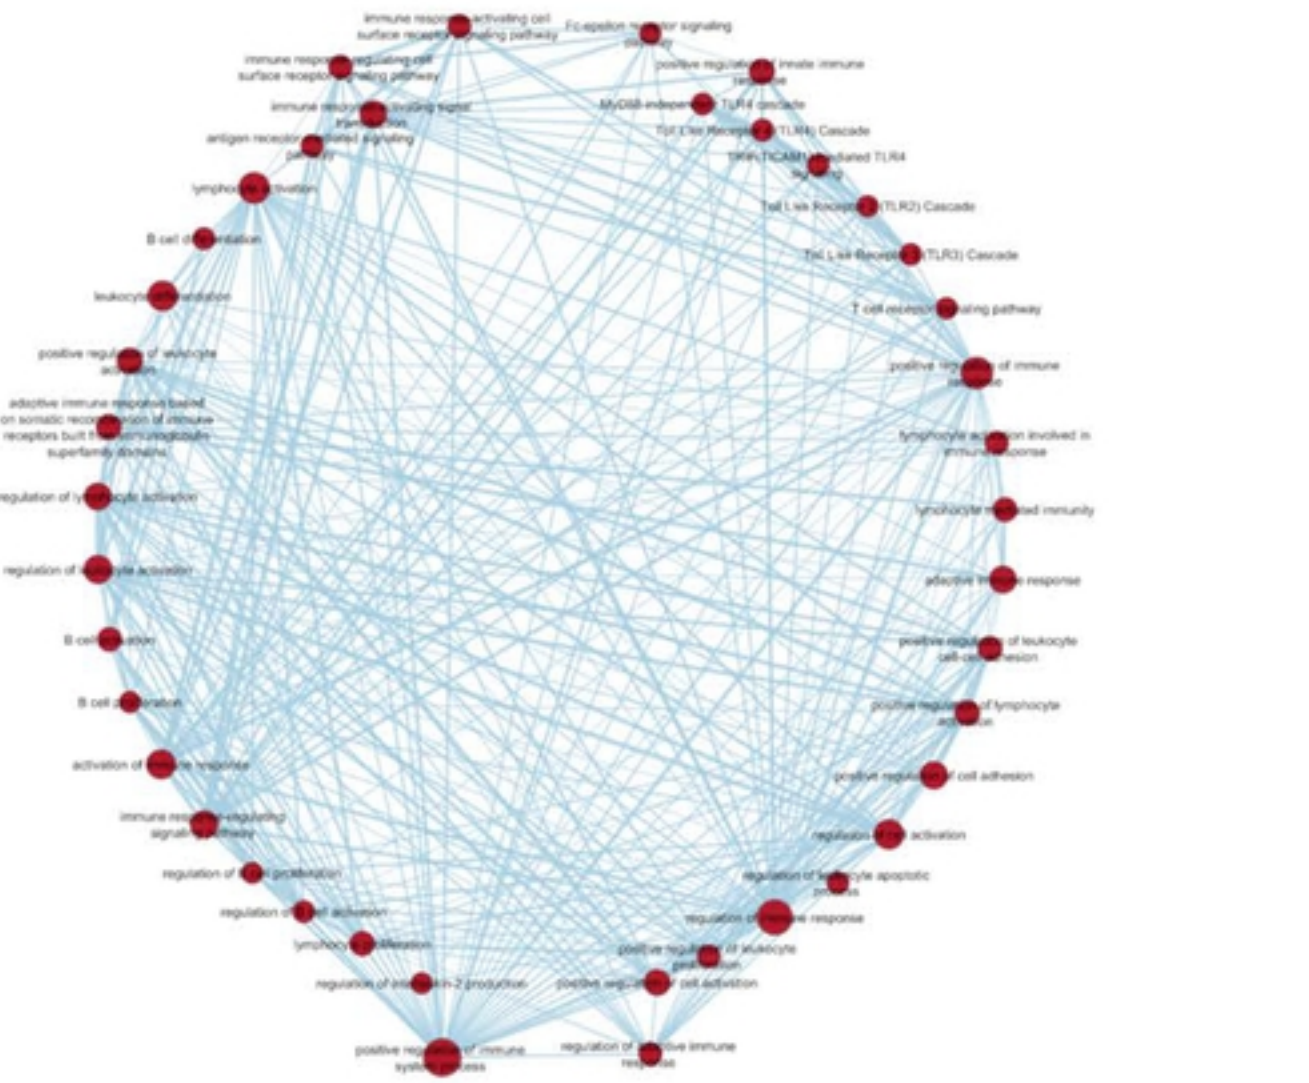

**Fatty acids and steroids node**

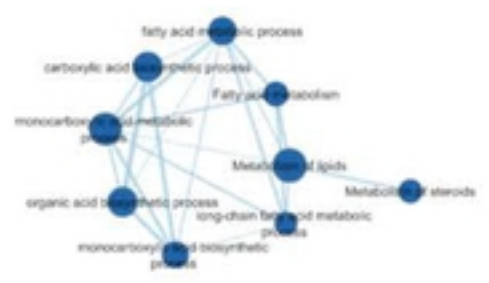



# Figure 7

## A) Immune cell regulation

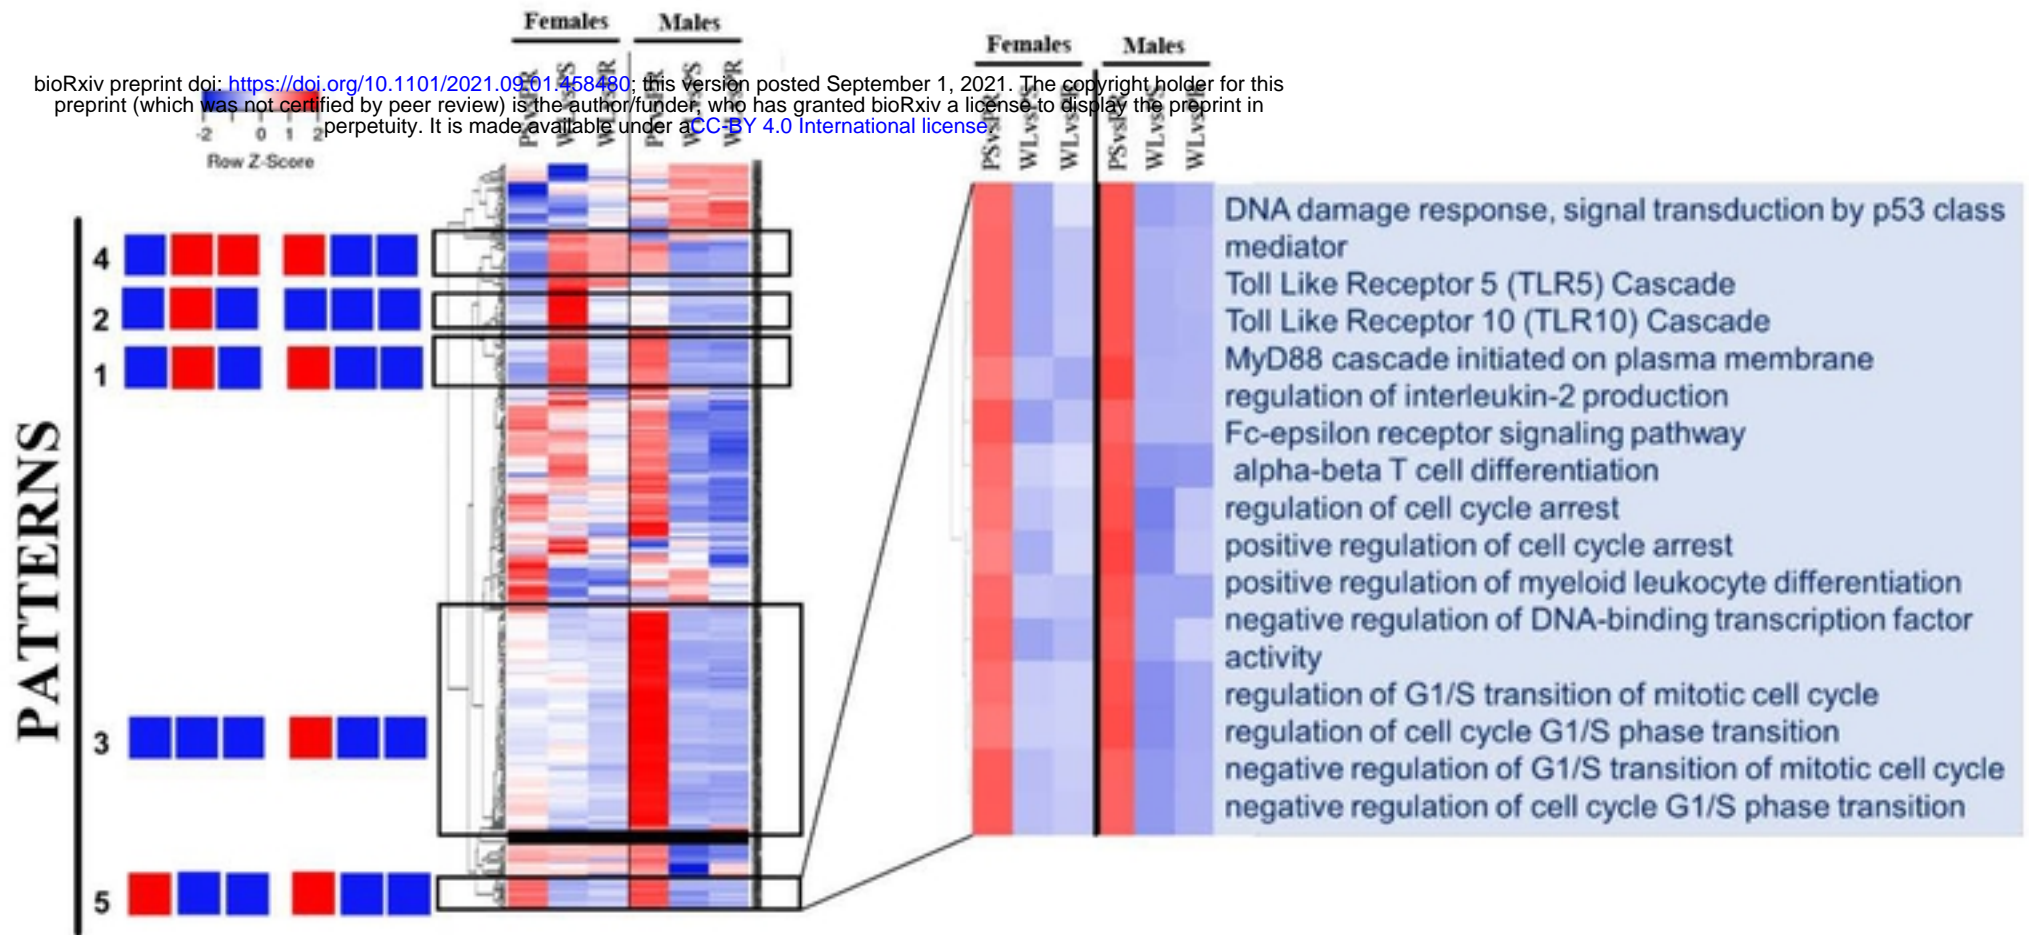

## B) Temporal Patterns

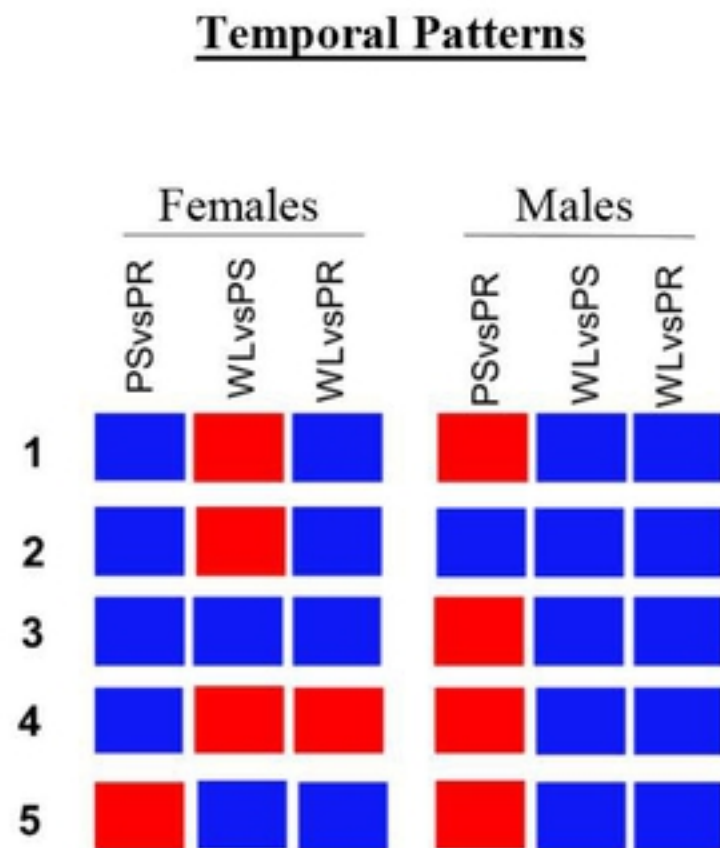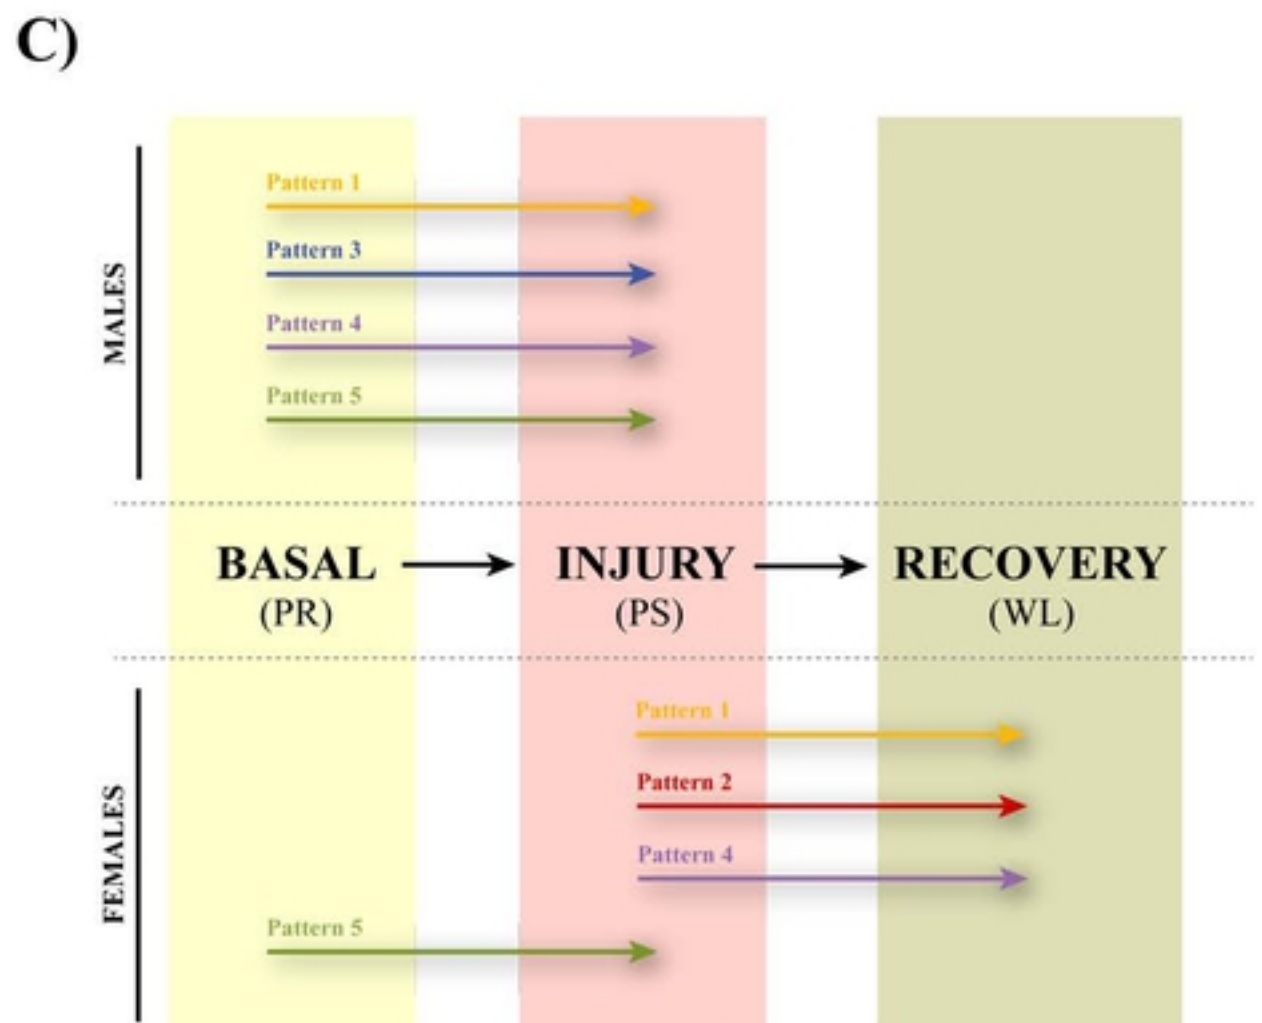

# Figure 8

A)

## Immune cell regulation

bioRxiv preprint doi: <https://doi.org/10.1101/2021.09.01.458480>; this version posted September 1, 2021. The copyright holder for this preprint (which was not certified by peer review) is the author/funder, who has granted bioRxiv a license to display the preprint in perpetuity. It is made available under aCC-BY 4.0 International license.

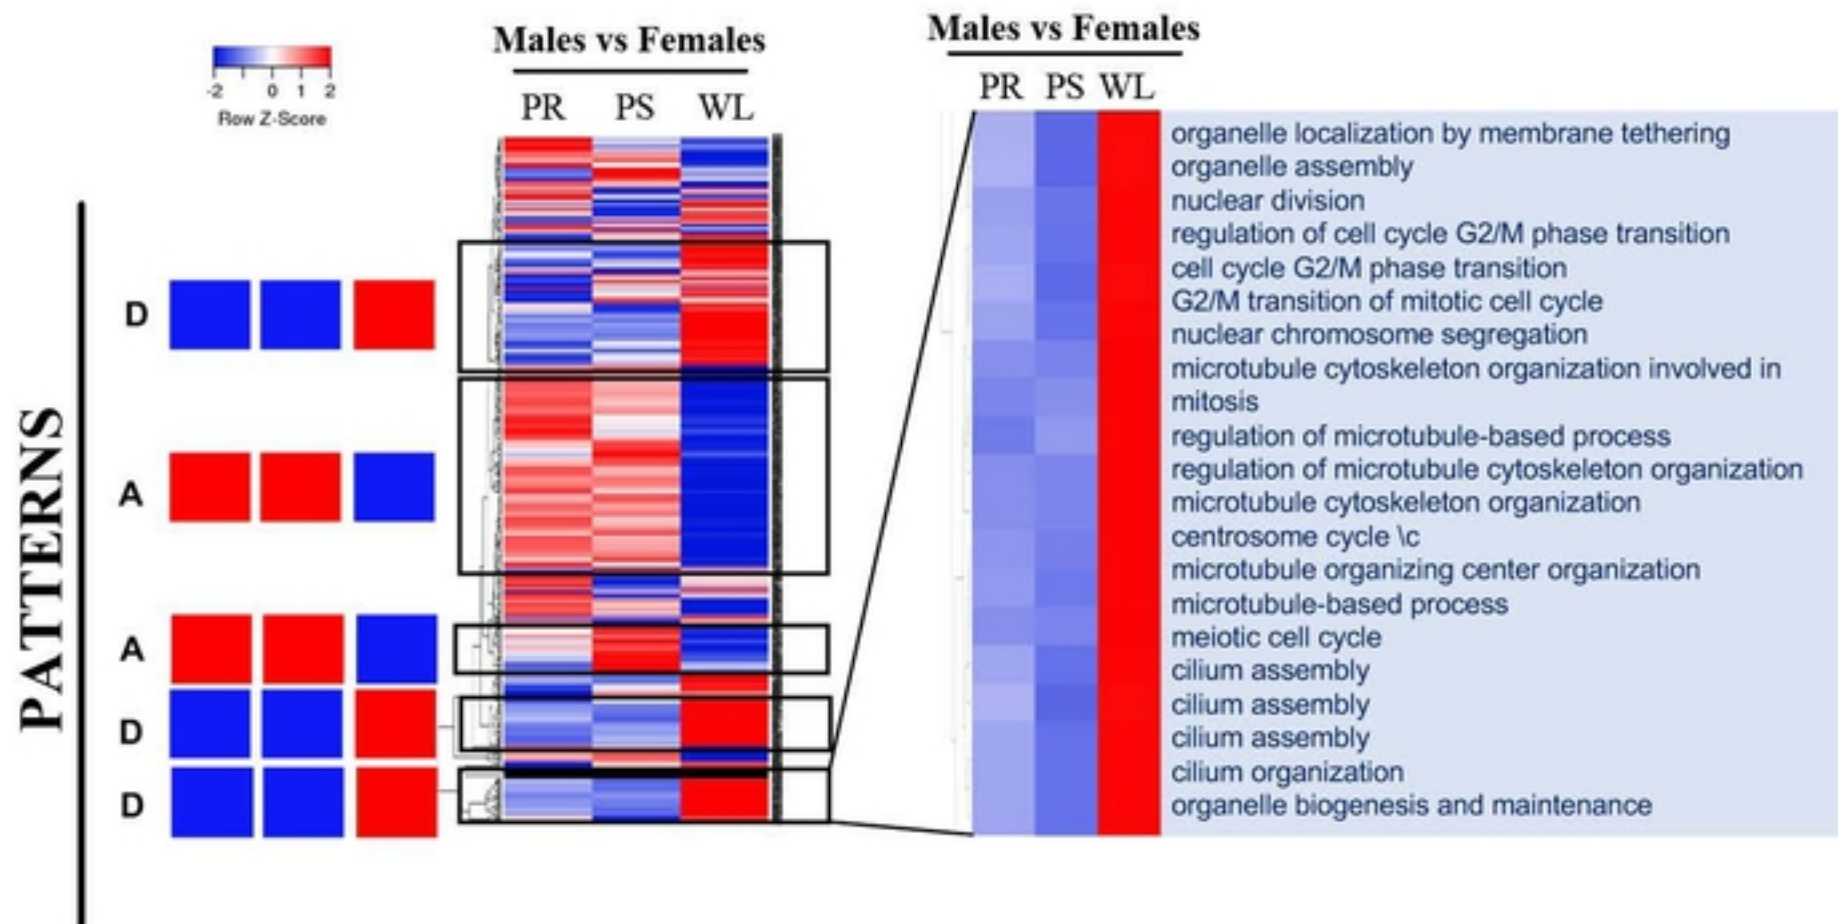

B)

## Sex-dependent Patterns

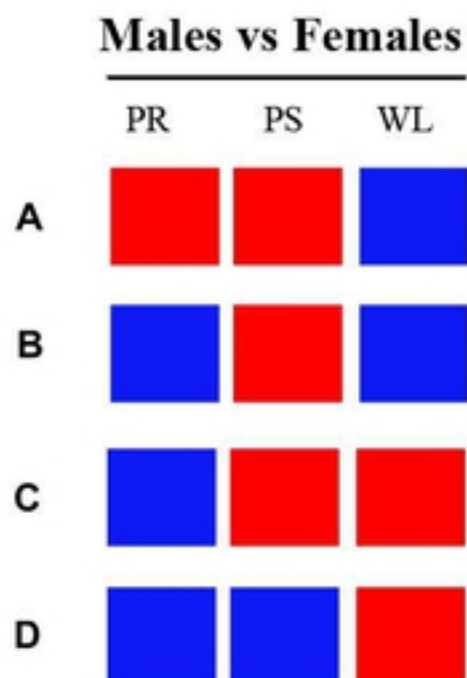

C)

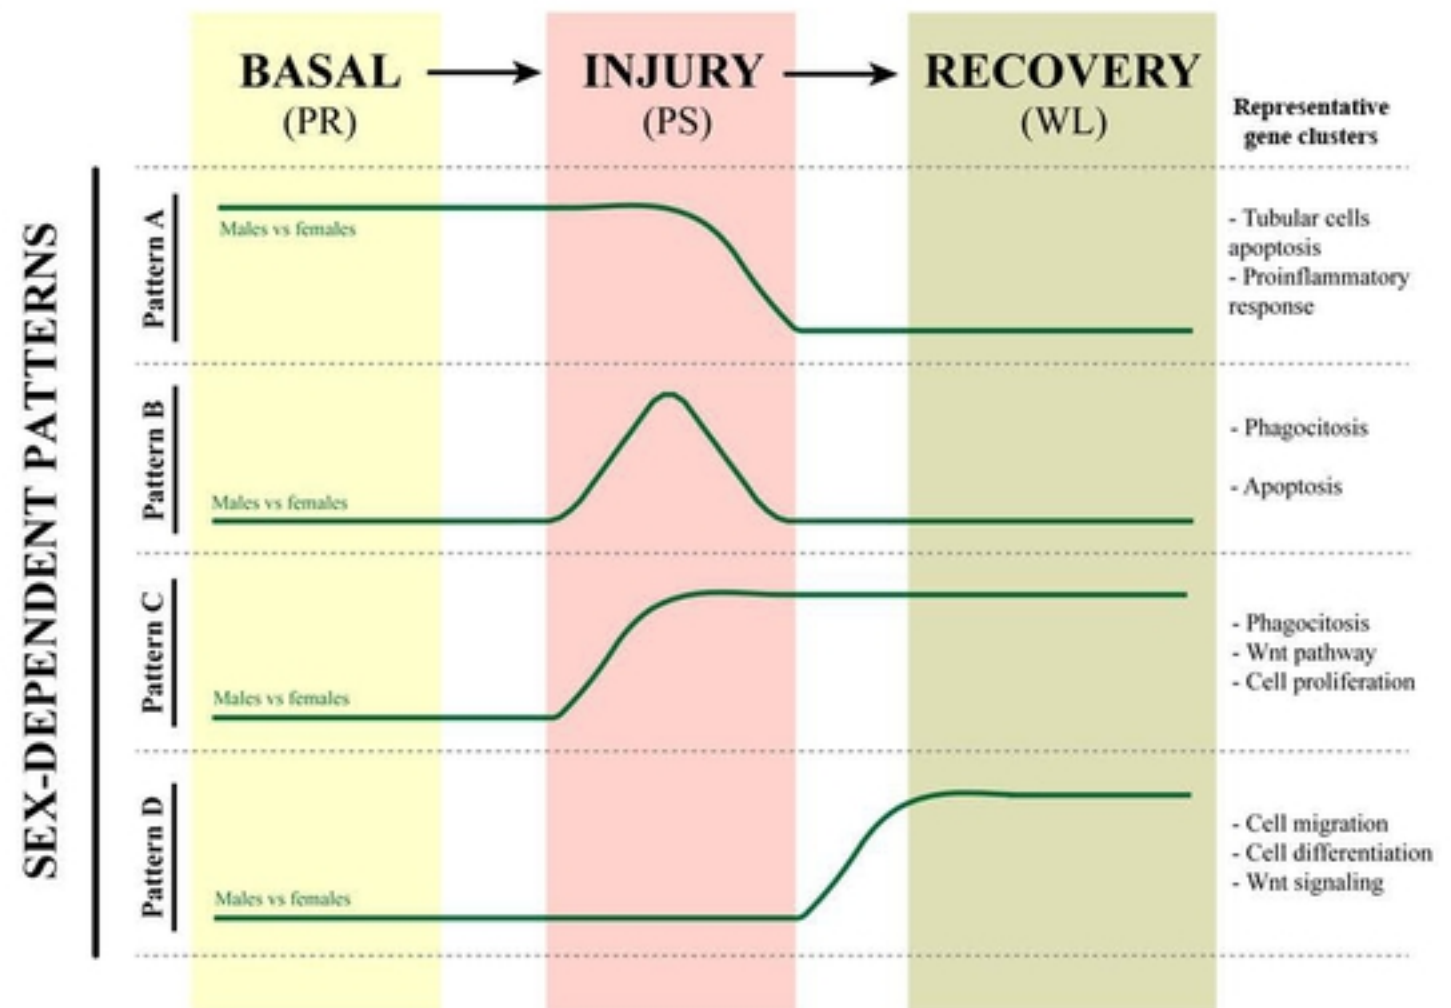

Source: https://www.biorxiv.org/content/10.1101/2021.09.01.458480v1.full.pdf
